1 **The timing and impact of psychiatric, cognitive and motor abnormalities in**  
2 **Huntington's disease**

3  
4 Branduff McAllister, BSc, PhD<sup>1</sup>, James F. Gusella, PhD<sup>2</sup>, G. Bernhard  
5 Landwehrmeyer, MD PhD<sup>3</sup>, Jong-Min Lee, PhD<sup>2</sup>, Marcy E. MacDonald, PhD<sup>2</sup>,  
6 Michael Orth, MD PhD<sup>4</sup>, Anne E. Rosser, MB BChir, FRCP, PhD<sup>5,6</sup>, Nigel M.  
7 Williams, BSc, PhD<sup>1</sup>, Peter Holmans, BA, PhD<sup>1</sup>, Lesley Jones, BSc, PhD<sup>1\*</sup> &  
8 Thomas H. Massey, MA, BM BCh, DPhil<sup>1\*</sup> on behalf of the REGISTRY Investigators  
9 of the European Huntington's disease network<sup>7</sup>

10  
11  
12 1 Division of Psychological Medicine and Clinical Neurosciences, Cardiff University,  
13 Cardiff, United Kingdom

14 2 Molecular Neurogenetic Unit, Center for Genomic Medicine, Massachusetts  
15 General Hospital and Department of Genetics, Harvard Medical School, Boston MA  
16 02114 USA

17 3 University of Ulm, Department of Neurology, Ulm, Germany

18 4 Swiss Huntington's disease Centre, Siloah, Bern, Switzerland

19 5 Brain Repair Group, Schools of Medicine and Biosciences, Cardiff University,  
20 Cardiff, United Kingdom

21 6 Neuroscience and Mental Health Research Institute, Cardiff University, Cardiff,  
22 United Kingdom

23 7 See Appendix 2

24  
25 \* Corresponding authors

26 Lesley Jones, Hadyn Ellis Building, Cardiff University, Cardiff CF24 4HQ, United  
27 Kingdom. Phone: 00442920688469. Email: JonesL1@cardiff.ac.uk

28 Thomas Massey, Hadyn Ellis Building, Cardiff University, Cardiff CF24 4HQ, United  
29 Kingdom. Phone: 00442920688353. Email: MasseyT1@cardiff.ac.uk

30  
31 Word count: 4500

32  
33  
34 Key words: Huntington, onset, symptom, psychiatric, cognitive

35  
36 Financial disclosures related to this manuscript: none

37  
38 Funding sources: BMC was supported by a PhD studentship from Cardiff University  
39 School of Medicine. TM was supported by a Welsh Clinical Academic Track  
40 Fellowship, an MRC Clinical Training Fellowship (MR/P001629/1) and a Patrick  
41 Berthoud Charitable Trust Fellowship through the Association of British Neurologists.  
42 LJ, NW and PH were supported by an MRC Centre grant (MR/L010305/1).

44

45

1

2

3

4

5

6

7

8

9

10

11

12

13

14

15

16

17

18

1 **Abstract**

2 Objective

3 To assess the prevalence, timing and functional impact of psychiatric, cognitive and  
4 motor abnormalities in Huntington's disease (HD), we analysed retrospective clinical  
5 data from individuals with manifest HD.

6

7 Methods

8 Clinical features of HD patients were analysed for 6316 individuals in the European  
9 REGISTRY study from 161 sites across 17 countries. Data came from clinical  
10 history and the Clinical Characteristics Questionnaire that assessed eight symptoms:  
11 motor, cognitive, apathy, depression, perseverative/obsessive behavior, irritability,  
12 violent/aggressive behavior, and psychosis. Multiple logistic regression was used to  
13 analyse relationships between symptoms and functional outcomes.

14

15 Results

16 The initial manifestation of HD is increasingly likely to be motor, and less likely to be  
17 psychiatric, as age at presentation increases. The nature of the first manifestation is  
18 not associated with pathogenic CAG repeat length. Symptom prevalence data from  
19 the patient-completed Clinical Characteristics Questionnaire correlate specifically  
20 with validated clinical measures. Using these data, we show that psychiatric and  
21 cognitive symptoms are common in HD, with earlier onsets associated with longer  
22 CAG repeats. 42.4% of HD patients reported at least one psychiatric or cognitive  
23 symptom before motor symptoms, with depression most common. Apathy and  
24 cognitive impairment tend to come later in the disease course. Each psychiatric or

1 cognitive symptom was associated with significantly reduced total functional capacity  
2 scores.

3

4 Conclusions

5 Psychiatric and cognitive symptoms occur before motor symptoms in many more HD  
6 patients than previously reported. They have a greater negative impact on daily life  
7 than involuntary movements and should be specifically targeted with clinical outcome  
8 measures and treatments.

9

## 1 **Introduction**

2 Huntington's disease (HD) is a central neurodegenerative disorder caused by an  
3 expanded CAG repeat (>35 CAGs) in the *Huntingtin* gene (*HTT*)<sup>1</sup>. Longer repeats  
4 are associated with earlier disease onset<sup>2,3</sup>. Neuronal loss is most prominent in the  
5 striatum but occurs widely in the brain, leading to a progressive movement disorder,  
6 cognitive decline and ultimately death. The motor disorder usually includes chorea,  
7 and may also involve dystonia, ataxia, oculomotor abnormalities and parkinsonism.  
8 In addition, individuals with HD develop a variable constellation of debilitating  
9 behavioural and psychiatric symptoms<sup>4,5</sup>; these 'non-motor' symptoms remain under-  
10 recognised and under-treated. Prospective studies of individuals carrying a  
11 pathogenic *HTT* CAG repeat but many years from predicted clinical onset have  
12 shown they have only subtle motor, cognitive or psychiatric deficits when compared  
13 with age and sex-matched controls<sup>6-8</sup>. This implies there is a window for therapeutic  
14 intervention to preserve normal brain functions. It is therefore crucial to understand in  
15 detail the timing and impact of different symptoms and signs in HD in order to target  
16 and assess potential disease-modifying therapies.

17 The HD Clinical Characteristics Questionnaire (HD-CCQ)<sup>9</sup> gathers retrospective data  
18 from individuals with HD about the prevalence and timing of eight motor, cognitive  
19 and psychiatric symptoms<sup>10</sup>. Here we validate the use of HD-CCQ data by showing  
20 strong and specific associations with established scores of depression, irritability and  
21 cognition. We then use HD-CCQ data to show the high prevalence of psychiatric and  
22 cognitive symptoms in HD, often in advance of motor symptoms, and their negative  
23 impact on the daily lives of patients.

24

## 1 **Methods**

### 2 **Standard protocol approvals, registrations and patient consents**

3 Participants were in the multicentre, multinational, observational REGISTRY study of  
4 European HD ([http://www.ehdn.org/wp-content/uploads/2018/06/registry-protocol-](http://www.ehdn.org/wp-content/uploads/2018/06/registry-protocol-3.0.pdf)  
5 [3.0.pdf](http://www.ehdn.org/wp-content/uploads/2018/06/registry-protocol-3.0.pdf); [NCT01590589](https://clinicaltrials.gov/ct2/show/study/NCT01590589)). Data were accessed as part of European Huntington's  
6 Disease Network (EHDN) data mining project 0791. Ethical approval for REGISTRY  
7 was obtained in each participating country. All participants gave written informed  
8 consent.

9

### 10 **Participant data**

11 HD participant data, collected June 2004 - February 2016 across 161 sites in 17  
12 European countries, was obtained for 6316 individuals (accessed October 2016)  
13 who had clinical HD onset, determined by the rating clinician in REGISTRY, and a  
14 confirmed pathogenic CAG length of 36-93 CAGs. Of these CAG sizes, 5027 were  
15 centrally determined by BioRep Inc. (Milan, Italy; REGISTRY protocols) and 1289  
16 were derived by local diagnostic laboratories. Two estimates of the age at onset of  
17 symptoms and/or signs in HD were used in this study. First, the clinician-estimated  
18 age at first HD manifestation based upon all available clinical evidence at the first  
19 REGISTRY visit (coded as 'sxrater'). Having a 'sxrater' age at onset was required for  
20 inclusion in this study. Onset type was classified as motor, cognitive, psychiatric,  
21 oculomotor, other or mixed. As the clinician's estimate was given as a date, age  
22 estimates were calculated using the participant's anonymised birthday; where only a  
23 year was given, July 15<sup>th</sup> was used for estimation (15/07/xxxx). Second, the ages at  
24 onset of different symptoms in HD patients were estimated by the HD Clinical  
25 Characteristics Questionnaire (HD-CCQ) which was completed by a healthcare

1 professional, usually a HD-specialist nurse or similarly-qualified person, using  
2 responses from the individual with HD and their care partners (present in clinic in  
3 93.1% of cases), and patient medical notes. The HD-CCQ comprises questions  
4 about eight symptoms commonly observed in HD, asking whether the participant has  
5 ever had the symptom (yes or no), and, if yes, the age at which the symptom was  
6 first experienced (Appendix 3). Information was available, at least in part, for 5609  
7 individuals. The symptoms recorded (number of individuals with data) were: motor  
8 (chorea or other, consistent with HD; 5603), cognitive impairment sufficient to impact  
9 on work or daily living (5591), apathy (5584), depression (5595),  
10 perseverative/obsessive behaviour (5588), irritability (5586), violent or aggressive  
11 behaviour (5586) and psychosis (5589). For subsequent analyses, missing data  
12 were handled using pairwise deletion to maximise the number of individuals.  
13 Typically, the rater estimate of clinical onset and initial HD-CCQ would be recorded  
14 at the first REGISTRY visit, sometimes by one clinician, and sometimes by a  
15 clinician and another qualified staff member such as HD-specialist nurse, depending  
16 on local clinic set-up. Subsequent visits updated the HD-CCQ: we used data from  
17 the most recent clinic visit. We had data on Shoulson-Fahn disease stage at last  
18 clinic visit for 4554 individuals (72.1% of our study population): stage 1 (Total  
19 Functional Capacity (TFC) 11-13; N=890; 19.5%), stage 2 (TFC 7-10; N=1278;  
20 28.1%), stage 3 (TFC 4-6; N=969; 21.3%), stage 4 (TFC 1-3; N=1133; 24.9%), stage  
21 5 (TFC 0; N=284; 6.2%).

22

23 The Hospital Anxiety/Depression Scale (HADS) and Snaith Irritability Scale (SIS)  
24 were completed by the participant at each clinic visit and provide measures of  
25 anxiety, depression and irritability at that specific time. We used lifetime highest total

1 depression and total irritability scores from both the HADS and the SIS in analyses.  
2 Similarly, the symbol-digit modalities test (SDMT) and Stroop tests of cognitive ability  
3 were administered as part of the Unified Huntington's Disease Rating Scale  
4 (UHDRS)<sup>11</sup> at each visit. The UHDRS consists of validated questionnaires, tools and  
5 examinations related to motor, cognitive, behavioural and functional impairments  
6 seen in HD. For the SDMT and Stroop, we used the total correct scores from the  
7 most recent clinic visit. Disease duration was estimated by taking the most recent  
8 visit and subtracting the clinician's estimate of disease onset. The product of  
9 Problem Behaviours Assessment (PBA-s) severity and frequency scores from the  
10 most recent clinic was used for modelling purposes.

11

## 12 **Statistical analyses of clinical data**

13 Total depression scores from HADS, total irritability scores from SIS, the number of  
14 correct answers in the SDMT, the number of correct answers in Stroop tests or  
15 composite PBA-s scores were regressed on HD clinical characteristics data, age,  
16 CAG length, sex and disease duration (table 1). To calculate coefficients of  
17 determination ( $R^2$  values, table 2), HD-CCQ age at onset data were natural log  
18 transformed. Only individuals with a known sex and a symptom onset  $\geq 3$  years were  
19 considered, and a residual vs leverage plot identified one influential data point  
20 passing Cook's distance that was removed from all  $R^2$  calculations.  $P$  values were  
21 calculated comparing male and female  $R^2$  values using Fisher's transformation<sup>12</sup>. A  
22 chi-square test was used to test for differences in symptom frequency, derived from  
23 the yes/no component of the HD-CCQ, between males and females.

24



1 Associations between binary responses in the HD-CCQ (1; experienced the  
2 symptom and 0; symptom not experienced) and clinical covariates were tested using  
3 logistic regression. The covariates used were sex, CAG length, alcohol consumption  
4 (units per week), tobacco use (cigarettes per day), education (years of education),  
5 TFC score and total motor score (TMS). An additional analysis regressed the type of  
6 HD onset defined by the clinician, coded as a binary variable, on the clinician's onset  
7 or CAG length (table e-2, doi:10.5061/dryad.pk0p2ngkz). This analysis was  
8 restricted to HD participants with CAGs 36-59, to be consistent with figure 1  
9 subgroups, and also to adult-onset HD individuals ( $\geq 20$  years). We also tested  
10 whether symptom presence was associated with the length of the wild-type (6-35  
11 CAGs) and expanded CAGs (36-93 CAGs) alleles in individuals of known sex, and  
12 for whom both CAG lengths were known (table e-3, doi:10.5061/dryad.pk0p2ngkz).  
13 19 individuals with a coincident formal diagnosis of schizophrenia, schizotypal  
14 disorder or schizoaffective disorder (ICD-10 F20, F21 or F25) were excluded from all  
15 models, although it was not possible to formally exclude these symptoms being part  
16 of the HD phenotype. Statistical analysis used *R* (version 3.6.0; R core team, 2019,  
17 <https://www.r-project.org/>).

18

### 19 **Data availability**

20 Further information and data requests should be directed to Thomas H. Massey  
21 ([MasseyT1@cardiff.ac.uk](mailto:MasseyT1@cardiff.ac.uk)). Anonymised summary data is available to qualified  
22 investigators. Furthermore, anonymised patient data is available from the European  
23 Huntington's Disease Network (EHDN) upon request given institutional assurance  
24 patient confidentiality will be upheld, and no attempt will be made to discover the  
25 identity of patients.

1

## 2 **Results**

### 3 **The initial manifestation of HD varies with age and CAG length**

4 The age at onset of the first unequivocal motor features of HD ('motor onset') has  
5 been used as a specific milestone in the natural history of HD in individuals, although  
6 it is only a crude measure of a progressive neuropathological process. It has proven  
7 particularly useful in recent genetic modifier studies of HD<sup>13,14</sup>. The first psychiatric  
8 and cognitive manifestations of HD are more difficult to define with certainty as they  
9 are less specific for HD and can occur many years before motor onset. The timing of  
10 the first feature of HD is typically retrospectively recorded by a rating physician in  
11 observational studies such as REGISTRY, based on clinical information and  
12 symptom history from patients and care partners<sup>9,15,16</sup>. The rater also records the  
13 initial major presenting feature out of a choice of six: motor, cognitive, psychiatric,  
14 oculomotor, other or mixed. We analysed the initial manifestation of HD for 6316  
15 participants in REGISTRY<sup>9</sup>, including 3083 males (48.8%) and 3233 females  
16 (51.2%). All participants had a confirmed genetic diagnosis of HD with a pathogenic  
17 CAG repeat length of 36-93 (figure e-1, doi:10.5061/dryad.pk0p2ngkz). The first  
18 manifestation of HD, determined by the rating physician, varied with patient age  
19 (figure 1A and table e-1, doi:10.5061/dryad.pk0p2ngkz). Individuals with onset  
20 before the age of 20, defined as juvenile HD, were equally likely to present with  
21 motor (24.5%), cognitive (21.8%) or psychiatric features (28.2%). In contrast, the  
22 initial manifestation of HD was more likely to be motor than psychiatric in adult-onset  
23 HD. As age at first manifestation increased (figure 1A and table e-2A,  
24 doi:10.5061/dryad.pk0p2ngkz) motor presentations became more likely (odds ratio  
25 (OR) = 1.06 per ten year increase in onset age, 95% confidence interval (CI) 1.04-

1 1.07;  $P = 7.4 \times 10^{-22}$ ) but psychiatric presentations became less likely (OR = 0.96 per  
2 ten year increase in onset age, 95% CI 0.95-0.97;  $P = 9.4 \times 10^{-16}$ ). For people  
3 presenting over the age of 60, over two-thirds (68.6%) had motor abnormalities at  
4 clinical onset with far fewer having psychiatric (11.5%) or cognitive (6.7%)  
5 presentations. Next, we tested whether there was any relationship between  
6 pathogenic CAG repeat length, known to be inversely correlated with age at clinical  
7 onset, and the presenting phenotype. Interestingly, there was no significant  
8 relationship between CAG length (36-59 inclusive) and the relative proportions of  
9 motor, cognitive and psychiatric onset cases (figure 1B and table e-2B,  
10 doi:10.5061/dryad.pk0p2ngkz). For the few cases with data and repeat lengths of  
11 more than 59 CAG we observed a more balanced distribution of motor, cognitive and  
12 psychiatric onsets, mirroring the trends seen for the juvenile HD cases.

13

#### 14 **Psychiatric and cognitive symptoms captured by the Clinical Characteristics**

##### 15 **Questionnaire correlate with scores from validated clinical tools**

16 The HD Clinical Characteristics Questionnaire (HD-CCQ) was introduced to later  
17 versions of REGISTRY as the best retrospective way of capturing symptom data in  
18 existing HD populations. It is completed by a healthcare professional using  
19 information from individuals with HD and their care partners, present in clinic for over  
20 93%, about lifetime history and age at onset of eight symptoms typical of HD. These  
21 symptoms are motor (compatible with HD), depression, irritability, violent or  
22 aggressive behavior, apathy, perseverative/obsessive behavior, psychosis and  
23 cognitive impairment sufficient to impact on work or daily living. In REGISTRY, this  
24 information was updated at each annual clinic visit.

25

1 Since prevalence data from HD-CCQ have not been used in large analyses before  
2 we first tested how well they correlated with validated clinical scores of depression  
3 (HADS), irritability (SIS) and cognition (SDMT and Stroop). To mitigate against  
4 potential effects of medication at certain times, we used the lifetime highest total  
5 depression and total irritability scores for each individual. For cognitive tests we used  
6 scores at the last recorded clinic visit as these would be expected to worsen  
7 progressively and be little affected by medication. Total depression score from HADS  
8 was significantly increased in individuals with depression recorded in HD-CCQ (table  
9 1; increase of 1.49 units, 95% CI 1.09-1.89;  $P = 5.7 \times 10^{-13}$ ). An increase in HADS  
10 score was also observed in individuals with HD-CCQ apathy, probably because  
11 apathy, common in HD, may be mistaken for depression by individuals and their care  
12 partners when completing the HD-CCQ. Total irritability score from SIS was  
13 significantly increased in individuals with HD-CCQ irritability (increase of 1.82 units,  
14 95% CI 1.37-2.27;  $P = 2.0 \times 10^{-15}$ ), and also with violent/aggressive behaviour  
15 (increase of 1.57 units, 95% CI 1.08-2.06;  $P = 3.3 \times 10^{-10}$ ), as expected. Both SDMT  
16 and Stroop scores of cognitive ability were significantly decreased in individuals with  
17 cognitive impairment as recorded in HD-CCQ (reductions of 3.52 units, 95% CI 2.71-  
18 4.33;  $P = 2.3 \times 10^{-17}$  and 3.41 units, 95% CI 2-65-4.17;  $P = 1.4 \times 10^{-22}$ , respectively).  
19 Significant associations between cognitive scores and motor and apathy symptoms  
20 were also observed. In addition, we found robust and specific associations between  
21 neuropsychiatric symptoms recorded in HD-CCQ and their related symptoms scored  
22 using the validated short-form Problem Behaviors Assessment (PBA-s; supplemental  
23 table e-4, doi:10.5061/dryad.pk0p2ngkz). The specificity of the associations between  
24 HD-CCQ data and recognised clinical scales validated the use of HD-CCQ data in  
25 subsequent analyses.

1

2 **Psychiatric symptoms are common in HD and are associated with CAG repeat**  
3 **length**

4 We next analysed the lifetime prevalence of the eight symptoms recorded in HD-  
5 CCQ in 5609 individuals with HD at their most recent clinic visit (table 2). The mean  
6 age at last recorded clinic visit was 53.3 years; 53.5 years for males with data (range  
7 10.4 – 92.6 years; N = 2569) and 53.2 years for females (range 7.9 – 90.2 years; N =  
8 2698). Almost all (>99%) had experienced motor symptoms compatible with HD.  
9 Although these symptoms are not defined explicitly in HD-CCQ, contemporaneous  
10 data from UHDRS showed that 96.8% of our study population had chorea, alongside  
11 variable amounts of incoordination, dystonia and rigidity. In HD gene carriers these  
12 motor symptoms are likely to be specific manifestations of HD. The next most  
13 prevalent symptom was depression, occurring in 64.5% of HD individuals with  
14 significantly more females affected than males (70.4% vs 58.2%; OR 1.70, 95% CI  
15 1.52-1.90;  $P = 2.6 \times 10^{-21}$ ). Cognitive impairment sufficient to impact upon work or  
16 activities of daily living, apathy and irritability were also each observed in over half of  
17 our HD population. Cognitive impairment and apathy were equally likely in males and  
18 females, but there was significantly more irritability observed in males (62.9% vs  
19 56.9%; OR 0.78, 95% CI 0.70-0.87;  $P = 4.0 \times 10^{-6}$ ). An excess of violent or  
20 aggressive behaviour was also observed in the male group (34.9% vs 27.0%; OR  
21 0.69, 95% CI 0.62-0.77;  $P = 2.0 \times 10^{-10}$ ). Psychosis was the least prevalent of the  
22 eight recorded symptoms, although this was still observed in over 11% of individuals  
23 with HD with no significant difference in prevalence between males and females.  
24 There was a strong inverse correlation between pathogenic CAG repeat length (40-  
25 55 CAG inclusive) and mean age at symptom onset for all symptoms analysed

1 (figure 2). We found no effect of wild-type CAG allele length on any symptom onset,  
2 nor any significant statistical interaction between expanded and wild-type repeat  
3 lengths (table e-3, doi:10.5061/dryad.pk0p2ngkz). Pathogenic CAG length explained  
4 66.3% of the variance in age at onset of motor symptoms, in line with previous  
5 estimates<sup>2,3,17-23</sup>, but also between 37.5% and 61.9% of the variance in onset of  
6 each of the psychiatric symptoms analysed (table 2). Depression had the weakest  
7 association with CAG repeat length ( $R^2 = 37.5\%$ ), likely reflecting the high prevalence  
8 of the symptom in the general population independent of HD and the lack of use of  
9 universal diagnostic criteria. CAG length accounted for significantly more of the  
10 variance in age at onset of perseverative/obsessive behaviour in males (table 2;  $P =$   
11  $3.7 \times 10^{-3}$ ) and irritability in females ( $P = 1.3 \times 10^{-3}$ ).

12

### 13 **The timing of motor and psychiatric symptoms in HD varies with symptom** 14 **type and CAG length**

15 Given that motor onset is often used as a specific milestone in the natural history of  
16 HD, we investigated the timing of each of the seven psychiatric/cognitive symptoms  
17 relative to the age at first motor symptoms recorded in HD-CCQ (figure 2). The  
18 differences in ages between first motor symptoms and each of the psychiatric  
19 symptoms were approximately normally distributed, with a wide range of at least +/-  
20 20 years in each case (figures 2 and e-2, doi:10.5061/dryad.pk0p2ngkz). In those  
21 patients reporting depression, onset occurred before motor symptoms in 39.2% (N=  
22 1369/3495). For patients with irritability, onset occurred before motor symptoms in  
23 30.8% (N= 996/3235). Perseverative/obsessive behaviour tended to occur later in  
24 the disease course, after motor symptoms, as did psychosis although numbers were  
25 smaller. Cognitive impairment and apathy had the most positively skewed

1 distributions with onset occurring after motor onset in 2179/3225 (67.6%) and  
2 1981/2852 (69.5%) of individuals, respectively. Overall, 42.4% of HD patients (N=  
3 2140/5042) reported at least one psychiatric or cognitive symptom in advance of  
4 motor symptoms, with a further 22.3% (N= 1126/5042) reporting at least one of  
5 these symptoms at the same time as motor abnormalities.

6  
7 We next assessed whether there were any patterns in the mean ages of onset of the  
8 different symptoms when plotted by CAG repeat length (figure 3). Some consistent  
9 relationships between symptoms were observed. Depression usually had the  
10 youngest mean age at onset, followed by motor impairment and then apathy and  
11 cognitive impairment as the latest symptoms. Mean age at onset of irritability  
12 preceded that of motor onset at shorter repeat lengths (40-43 CAGs, inclusive) but  
13 tended to follow it at longer repeat lengths (44-53 CAGs, inclusive). The mean  
14 difference in years from onset of first symptom to last decreased with CAG repeat  
15 length from approximately 8 years for 40 repeats to 4 years for 55 repeats (figure 3).

16

### 17 **Cognitive and psychiatric symptoms are significantly associated with reduced** 18 **functional capacity**

19 To assess whether psychiatric, cognitive or motor symptoms were associated with  
20 altered functional abilities we used multiple logistic regression (table 4). This analysis  
21 incorporated sex, pathogenic CAG length, duration of disease from clinical onset to  
22 last clinic visit, alcohol consumption, tobacco use, educational attainment, total  
23 functional capacity score and total motor score as predictors of the  
24 presence/absence of each HD-CCQ symptom. The presence of any of the  
25 psychiatric or cognitive symptoms was significantly associated with lower total

1 functional capacity (TFC), an indication of impaired ability to work, manage personal  
2 finances and function independently. Cognitive impairment was most significantly  
3 associated with reduced TFC (OR per unit decrease in TFC = 1.28, 95% CI 1.23-  
4 1.35;  $P = 1.6 \times 10^{-25}$ ). Depression was significantly associated with lower total motor  
5 scores (indicating fewer motor symptoms or signs), fitting with its prevalence early in  
6 the disease course. Finally, significant associations were observed between  
7 depression and female sex (OR = 1.77, 95% CI 1.44-2.17;  $P = 7.0 \times 10^{-8}$ ) and  
8 tobacco use and irritability (OR per extra cigarette per day = 1.02, 95% CI 1.01-1.03;  
9  $P = 1.0 \times 10^{-4}$ ). Although not reaching strict criteria for significance after correcting for  
10 multiple tests, associations were also found between male sex and irritability (OR =  
11 0.75, 95% CI 0.61-0.92;  $P = 5.4 \times 10^{-3}$ ) and lower educational attainment and  
12 psychosis (OR per extra year of education = 0.92, 95% CI 0.88-0.97;  $P = 2.2 \times 10^{-3}$ ).

13



## 1 **Discussion**

2 In this large study of over 6000 patients we have shown that the initial manifestation  
3 of HD varies significantly with age: late onset (>60 years) is usually associated with  
4 motor abnormalities, whereas early onset (<20 years; juvenile HD) is associated with  
5 a wider range of motor, cognitive and psychiatric presentations (figure 1A). These  
6 results extend prior studies which have shown that motor presentation of HD is  
7 common in late-onset disease (65.5% of an earlier REGISTRY cohort<sup>24</sup>), with more  
8 variable presentations in juvenile HD<sup>25,26</sup>. Approximately 20% of HD patients present  
9 with rater-determined psychiatric features, in line with previous findings (table e-1,  
10 doi:10.5061/dryad.pk0p2ngkz)<sup>9</sup>. Cognitive onset of HD might be under-reported in  
11 older age-groups due to it being regarded as coincident 'age-related' change.  
12 Importantly, our results show there is little relationship between pathogenic CAG  
13 repeat length and onset type in adult-onset HD (figure 1B), despite both being  
14 associated with age at clinical onset. These data fit a model in which age at clinical  
15 onset is driven primarily by CAG repeat length, but modified by environmental factors  
16 and variants at other genomic loci<sup>14,23,27,28</sup>. The age and physiology of the brain at  
17 clinical onset subsequently determines the types of symptoms that become manifest.  
18 Previous analysis of a smaller cohort showed that the expanded CAG repeat is fully  
19 dominant for motor onset of HD, with no effect of the normal *HTT* CAG allele<sup>17</sup>. We  
20 confirmed this result and showed that the same is true for all psychiatric and  
21 cognitive symptoms (table e-3, doi:10.5061/dryad.pk0p2ngkz). The age at onset of  
22 each symptom recorded by HD-CCQ was inversely correlated with CAG length  
23 (figure 3), with motor symptoms best correlated and depression least correlated  
24 (table 3). These data are consistent with previous reports showing that CAG length  
25 accounts for 47-72% of the variance in age at motor onset of HD<sup>29</sup>, but do not fit with

1 previous studies that reported no correlation between CAG repeat length and  
2 psychiatric symptoms<sup>30–33</sup>. However, these studies were small and often examined  
3 incident psychiatric symptoms, which can fluctuate over time, rather than lifetime  
4 history as here. Increasingly accurate CAG tract sizing will improve the accuracy of  
5 correlations between repeat length and symptoms<sup>14,34,35</sup>.

6 Most modifier studies of HD have used age at motor onset as a quantitative trait.  
7 Motor signs (predominantly chorea at onset) in the context of an expanded CAG  
8 repeat in *HTT* have high specificity for HD and most individuals with manifest HD  
9 report motor symptoms. However, psychiatric and cognitive symptoms are often  
10 more debilitating for patients and can occur early in the disease course<sup>36</sup>. These  
11 symptoms are common in HD (table 2), and much more prevalent than in the non-  
12 HD population<sup>5,10,37</sup>. Neuropsychiatric symptoms are also likely underestimated in  
13 HD due to pathological unawareness of these traits by patients<sup>38</sup>. Recent genetic  
14 evidence has shown that polygenic risk scores for psychiatric disorders, particularly  
15 depression and schizophrenia, are associated with increased risk of corresponding  
16 psychiatric symptoms in HD<sup>39</sup>. This suggests that the expanded *HTT* CAG repeat  
17 might lower the genetic threshold for manifestation of typical psychiatric symptoms<sup>39</sup>.

18 In agreement, we found the expected relationships between female sex and  
19 depression and male sex and irritability in our cohort (table 4). The nominally  
20 significant negative association of psychosis in HD with educational level (table 4)  
21 also corroborates work showing that higher levels of education are associated with  
22 decreased schizophrenia risk<sup>40</sup>.

23 The HD-CCQ captures quantitative information not available elsewhere on symptom  
24 prevalence and timing in the HD population. Prior to its introduction in REGISTRY,  
25 age at first motor symptoms was not routinely recorded for all HD patients. HD-CCQ

1 provides particular insight into neuropsychiatric symptoms but is not designed to  
2 capture the subtle early motor or cognitive signs found in prospective studies<sup>7,8</sup>. As it  
3 relies on retrospective reporting by patients and care partners the HD-CCQ is  
4 necessarily coarse, although the data it generates correlate well with more precise  
5 measures of depression, irritability and cognition (table 1). Cognitive impairment  
6 measured by SDMT or Stroop correlated most strongly with lifetime history of  
7 cognitive impairment in HD-CCQ, as expected, but also showed significant  
8 correlations with motor symptoms and apathy. These results fit with other studies  
9 showing that these symptoms track together in the disease trajectory<sup>39,41</sup>. There was  
10 also a significant association between cognitive impairment and psychosis, which fits  
11 the cognitive deficits observed in schizophrenia<sup>42</sup>. Conversely, validated depression  
12 and irritability scores correlated well with their respective prevalence data from HD-  
13 CCQ but were not associated with motor or cognitive impairment (table 1).

14 Despite considerable variation in the timing of psychiatric and motor symptoms,  
15 there are some conserved patterns (figures 2 & 3). Depression, and less often  
16 irritability, can precede motor symptoms by many years. Conversely, apathy and  
17 cognitive impairment tend to occur after motor symptoms, although patients do  
18 recognise and report these symptoms less readily than depression or irritability.

19 Overall, the HD-CCQ data show that 64.8% of our HD population (N = 3266/5042)  
20 reported at least one psychiatric or cognitive symptom by the time of first motor  
21 symptoms. This is a much higher figure than previously reported based on clinician  
22 estimates of first HD manifestation (figure 1)<sup>9</sup>, most likely because it is difficult to  
23 confidently attribute early psychiatric symptoms to HD. Clinically, it is currently  
24 impossible to distinguish between symptoms arising as a result of the HD mutation  
25 and those from primary psychiatric disorders, particularly in younger pre-manifest

1 patients in whom diseases such as depression are common<sup>43</sup>. Furthermore,  
2 environmental effects on mental health, such as living in a family with HD, should not  
3 be overlooked. Future studies of psychiatric and cognitive symptoms and signs in  
4 HD gene carriers against gene-negative community controls might help define a HD-  
5 specific neuropsychiatric phenotype that would enable more confident attribution of  
6 early abnormalities to HD.

7 We acknowledge several potential limitations of these data: they are retrospective,  
8 subject to recall bias, and cross-sectional. Symptom onset data based on patient and  
9 care partner memory cannot be used to define unequivocal clinical onset of HD.

10 Furthermore, HD-CCQ data depend on the interpretation of questions: for example,  
11 'motor symptoms' are not explicitly defined and so although 96.8% of our population  
12 had chorea this was not documented in HD-CCQ. Future iterations might usefully  
13 subdivide 'motor symptoms' into 'chorea' and 'other HD-related motor abnormalities'.

14 Our analyses are based on data from the most recent clinic visit which is at different  
15 points of the disease course in different individuals. We controlled for this by using  
16 disease duration, the time between first onset and last clinic visit, as a covariate in  
17 analyses. The use of psychoactive medications is found in up to 60% of HD patients  
18 and might confound motor and neuropsychiatric phenotypes<sup>9,44</sup>. Of drugs prescribed  
19 for chorea, tetrabenazine can induce depression and antipsychotics can reduce  
20 irritability. They also suppress motor manifestations which might affect the total  
21 motor scores used here as a co-variate (table 4). It is hard to control for these  
22 effects. Drugs prescribed to treat symptoms once they are present will not influence  
23 symptom onset data. We used worst-ever depression and irritability scores when  
24 validating the use of HD-CCQ to mitigate against the effects of medication  
25 prescribed at certain times.

1 Previous prospective studies of phenotype in HD such as PREDICT-HD and  
2 TRACK-HD have shown subtle early reductions in psychiatric and cognitive function  
3 years in advance of clinical onset<sup>7,8</sup>. The HD-CCQ accesses retrospective data from  
4 large existing populations of manifest HD patients and shows similar trends. Since  
5 the HD-CCQ is part of ongoing longitudinal observational studies such as ENROLL-  
6 HD, future analyses of larger populations will be possible and of benefit. The  
7 presence of psychiatric and cognitive symptoms in HD patients is associated with  
8 significantly reduced functional capacity, emphasizing the importance of early  
9 management of these symptoms<sup>45,46</sup>. Although recent models of HD staging and  
10 progression do not directly include psychiatric and cognitive symptoms<sup>47-49</sup>, work is  
11 underway to include them in ongoing observational studies and clinical trials to  
12 improve the accuracy of clinical outcome measures. Given the prevalence, timing  
13 and impact of psychiatric and cognitive abnormalities in HD demonstrated here, their  
14 treatment should form a central part of assessing the efficacy of novel treatments  
15 that are potentially disease-modifying, such as Huntingtin-lowering<sup>50</sup>.

16

## 17 **Acknowledgments**

18 We thank all the patients who contributed data to this research. B.Mc. was supported  
19 by a PhD studentship from Cardiff University School of Medicine. J.F.G. and M.E.M.  
20 received support from NIH grant NS091161 and from the CHDI Foundation, Inc. J-  
21 M.L. received support from grant R01NE-105709. A.E.R. received support from  
22 MRC, Wellcome Trust, Campaign for Alzheimer's Research in Europe, Horizon  
23 2020, JPND and Health and Care Research Wales. L.J., N.M.W. and P.H. were  
24 supported by an MRC Centre grant (MR/L010305/1). T.H.M. was supported by a  
25 Welsh Clinical Academic Track Fellowship, an MRC Clinical Training Fellowship

1 (MR/P001629/1) and a Patrick Berthoud Charitable Trust Fellowship through the  
2 Association of British Neurologists.

3

4

5 **Financial Disclosures of all authors (for the preceding 12 months)**

6 J.F.G.: Scientific Advisory Board member and has a financial interest in Triplet  
7 Therapeutics, Inc. His NIH-funded project is using genetic and genomic approaches  
8 to uncover other genes that significantly influence when diagnosable symptoms  
9 emerge and how rapidly they worsen in Huntington Disease. The company is  
10 developing new therapeutic approaches to address triplet repeat disorders such  
11 Huntington's Disease, Myotonic Dystrophy and spinocerebellar ataxias. His interests  
12 were reviewed and are managed by Massachusetts General Hospital and Partners  
13 HealthCare in accordance with their conflict of interest policies.

14 G.B.L.: Consulting services, advisory board functions, clinical trial services and/or  
15 lectures for Allergan, Alnylam, Amarin, AOP Orphan Pharmaceuticals AG, Bayer  
16 Pharma AG, CHDI Foundation, GlaxoSmithKline, Hoffmann-LaRoche, Ipsen, ISIS  
17 Pharma, Lundbeck, Neurosearch Inc, Medesis, Medivation, Medtronic, NeuraMetrix,  
18 Novartis, Pfizer, Prana Biotechnology, Sangamo/Shire, Siena Biotech, Temmler  
19 Pharma GmbH and Teva Pharmaceuticals. He has received research grant support  
20 from the CHDI Foundation, the Bundesministerium für Bildung und Forschung  
21 (BMBF), the Deutsche Forschungsgemeinschaft (DFG), the European Commission  
22 (EU-FP7, JPND). His study site Ulm has received compensation in the context of the  
23 observational Enroll-HD Study, TEVA, ISIS and Hoffmann-Roche and the

1 Gossweiler Foundation. He receives royalties from the Oxford University Press and  
2 is employed by the State of Baden-Württemberg at the University of Ulm.

3 A.E.R.: Chair of European Huntington's Disease Network (EHDN) executive  
4 committee, Global PI for Triplet Therapeutics

5 L.J. is a member of the scientific advisory boards of LoQus23 Therapeutics and  
6 Triplet Therapeutics and has received grant support from CHDI.

7 T.H.M. is an associate member of the scientific advisory board of LoQus23  
8 Therapeutics.

9 B.Mc., J-M.L., M.E.M., M.O., N.M.W., P.H.: nothing to disclose

10

11

## 1 **Appendix 1 – Authors**

| Name                                         | Location                                             | Contribution/Role                                                                                                            |
|----------------------------------------------|------------------------------------------------------|------------------------------------------------------------------------------------------------------------------------------|
| Branduff McAllister, BSc, PhD                | Cardiff University, Cardiff, UK                      | Organized data; Designed and executed statistical analyses; Wrote first paper draft; Reviewed and critiqued paper manuscript |
| James F. Gusella, PhD                        | Massachusetts General Hospital, Boston, USA          | Reviewed and critiqued paper manuscript                                                                                      |
| Bernhard Landwehrmeyer, MD, PhD              | University of Ulm, Ulm, Germany                      | Reviewed and critiqued paper manuscript                                                                                      |
| Jong-Min Lee, PhD                            | Massachusetts General Hospital, Boston, USA          | Reviewed and critiqued paper manuscript                                                                                      |
| Marcy E. MacDonald, PhD                      | Massachusetts General Hospital, Boston, USA          | Reviewed and critiqued paper manuscript                                                                                      |
| Michael Orth, MD, PhD                        | Swiss Huntington's disease Centre, Bern, Switzerland | Reviewed and critiqued paper manuscript                                                                                      |
| Anne E. Rosser, MB BChir, FRCP, PhD          | Cardiff University, Cardiff, UK                      | Reviewed and critiqued paper manuscript                                                                                      |
| Nigel M. Williams, BSc, PhD                  | Cardiff University, Cardiff, UK                      | Reviewed and critiqued paper manuscript                                                                                      |
| Peter Holmans, BA, PhD                       | Cardiff University, Cardiff, UK                      | Designed and conceptualized study; Designed and critiqued statistical analyses; Reviewed and critiqued paper manuscript      |
| Lesley Jones, BSc, PhD (*)                   | Cardiff University, Cardiff, UK                      | Designed and conceptualized study; Wrote first paper draft; Reviewed and critiqued paper manuscript                          |
| Thomas H. Massey, MA, BM Bch, DPhil (*), (†) | Cardiff University, Cardiff, UK                      | Designed and conceptualized study; Wrote first paper draft; Reviewed and critiqued paper manuscript                          |

2 (\*) indicates corresponding authors

3 (†) indicates the principal investigator

4



## 1 Appendix 2 – Co-investigators of the European Huntington’s 2 Disease Network REGISTRY Study

| Name                      | Location | Contribution/Role                              | Name                        | Location | Contribution/Role                              |
|---------------------------|----------|------------------------------------------------|-----------------------------|----------|------------------------------------------------|
| Raphael M. Bonelli        | 1,3      | Site Investigator, REGISTRY Steering Committee | Christoph Linder            | 4        | Site Investigator                              |
| Karen Hecht               | 1        | Site Investigator                              | Walter Pirker               | 4        | Site Investigator                              |
| Brigitte Herranhof        | 1        | Site Investigator                              | Dirk Liessens               | 5        | Site Investigator                              |
| Anna Holl (formerly Hödl) | 1        | Site Investigator                              | Godelinde Calmeyn           | 5        | Site Investigator                              |
| Hans-Peter Kapfhammer     | 1        | Site Investigator                              | Nele Somers                 | 5        | Site Investigator                              |
| Michael Koppitz           | 1        | Site Investigator                              | Isabelle Delvaux            | 5        | Site Investigator                              |
| Sabine Lilek              | 1        | Site Investigator                              | Andrea Boogaerts            | 5,10     | Site Investigator                              |
| Markus Magnet             | 1        | Site Investigator                              | Anja Flamez                 | 6        | Site Investigator                              |
| Nicole Müller             | 1        | Site Investigator                              | Sylvie de Raedt             | 6        | Site Investigator                              |
| Daniela Otti              | 1        | Site Investigator                              | Nick Alaerts                | 7        | Site Investigator                              |
| Annamaria Painold         | 1        | Site Investigator                              | Hichem Slama                | 7        | Site Investigator                              |
| Karin Reisinger           | 1        | Site Investigator                              | Frédéric Supiot             | 7        | Site Investigator                              |
| Monika Scheibl            | 1        | Site Investigator                              | Eric Constant               | 8        | Site Investigator                              |
| Helmut Schögggl           | 1        | Site Investigator                              | Anne-Françoise Gillardin    | 8        | Site Investigator                              |
| Jasmin Ullah              | 1,40     | Site Investigator                              | Marie-Claude Léonard        | 8        | Site Investigator                              |
| Eva-Maria Braunwarth      | 2        | Site Investigator                              | Christine Verellen-Dumoulin | 8,9      | Site Investigator, REGISTRY Steering Committee |
| Florian Brugger           | 2        | Site Investigator                              | Françoise van de Wyngaerde  | 8        | Site Investigator                              |
| Lisa Buratti              | 2        | Site Investigator                              | Michel Dupuis               | 9        | Site Investigator                              |
| Eva-Maria Hametner        | 2        | Site Investigator                              | Cécile Minet                | 9        | Site Investigator                              |
| Caroline Hepperger        | 2        | Site Investigator                              | Pascale Ribaï               | 9        | Site Investigator                              |
| Christiane Holas          | 2        | Site Investigator                              | Dominique Van Paemel        | 9        | Site Investigator                              |
| Anna Hotter               | 2        | Site Investigator                              | Wim Vandenberghe            | 10       | Site Investigator, REGISTRY Steering Committee |
| Anna Hussl                | 2        | Site Investigator                              | Dimphna van Reijen          | 10       | Site Investigator                              |
| Barbara Larcher           | 2        | Site Investigator                              | Petra Weckx                 | 10       | Site Investigator                              |
| Philipp Mahlknecht        | 2        | Site Investigator                              | Michaela Kaiserova          | 11       | Site Investigator                              |
| Christoph Müller          | 2        | Site Investigator                              | Zuzana Šenkárová            | 11       | Site Investigator                              |
| Bernadette Pinter         | 2        | Site Investigator                              | Ondřej Bezdíček             | 12       | Site Investigator                              |
| Werner Poewe              | 2        | Site Investigator                              | Jiří Klempíř                | 12,166   | Site Investigator, REGISTRY Steering Committee |
| Eva-Magdalena Reiter      | 2        | Site Investigator                              | Olga Klempířová             | 12       | Site Investigator                              |
| Klaus Seppi               | 2        | Site Investigator                              | Veronika Majerová-Ibarburu  | 12       | Site Investigator                              |
| Fabienne Sprenger         | 2        | Site Investigator                              | Tomáš Nikolai               | 12       | Site Investigator                              |
| Gregor Wenning            | 2        | Site Investigator                              | Jan Roth                    | 12       | Site Investigator                              |
| Gunther Ladurner          | 3        | Site Investigator                              | Irena Stárková              | 12       | Site Investigator                              |
| Stefan Lilek              | 3        | Site Investigator                              | Louise Hasselstrøm Madsen   | 13       | Site Investigator                              |
| Daniela Sinadinosa        | 3        | Site Investigator                              | Anette Torvin Møller        | 13       | Site Investigator                              |
| Wolfgang Staffen          | 3        | Site Investigator                              | Lena Hjerminde              | 14       | Site Investigator                              |
| Anna Maria Walleczek      | 3        | Site Investigator                              | Oda Jacobsen                | 14       | Site Investigator                              |

| Name                          | Location | Contribution/Role                                    | Name                           | Location | Contribution/Role                                    |
|-------------------------------|----------|------------------------------------------------------|--------------------------------|----------|------------------------------------------------------|
| Ida Unmack Larsen             | 14       | Site Investigator                                    | Marie Bost                     | 23       | Site Investigator                                    |
| Suzanne Lindquist             | 14       | Site Investigator                                    | Bénédicte Gohier               | 23       | Site Investigator                                    |
| Jørgen E. Nielsen             | 14       | Site Investigator,<br>REGISTRY Steering<br>Committee | Marie-Anne Guérid              | 23       | Site Investigator                                    |
| Lisbeth Regeur                | 14       | Site Investigator                                    | Audrey Olivier                 | 23       | Site Investigator                                    |
| Peter Roos                    | 14       | Site Investigator                                    | Julie Prouzet                  | 23       | Site Investigator                                    |
| Jette Stockholm               | 14       | Site Investigator                                    | Adriana Prundean               | 23       | Site Investigator                                    |
| Christina Vangsted-<br>Hansen | 14       | Site Investigator                                    | Clarisse Scherer-<br>Gagou     | 23       | Site Investigator                                    |
| Tua Vinther-Jensen            | 14       | Site Investigator                                    | Christophe Verny               | 23       | Site Investigator                                    |
| Annette Lolk                  | 15       | Site Investigator                                    | Blandine Babiloni              | 24       | Site Investigator                                    |
| Marianne Lundsgaard           | 15       | Site Investigator                                    | Déborah Bled                   | 24       | Site Investigator                                    |
| Lene Wermuth                  | 15       | Site Investigator                                    | Sabrina Debruxelles            | 24       | Site Investigator                                    |
| Christian Andersson           | 16       | Site Investigator                                    | Charlotte Duché                | 24       | Site Investigator                                    |
| Clara Nyberg                  | 16       | Site Investigator                                    | Sonia Fraisse                  | 24       | Site Investigator                                    |
| Jimmy Sundblom                | 16,121   | Site Investigator                                    | Cyril Goizet                   | 24       | Site Investigator                                    |
| Maarit Peippo                 | 17       | Site Investigator                                    | Laetitia Jameau                | 24       | Site Investigator                                    |
| Marjatta Sipponen             | 17       | Site Investigator                                    | Danielle Lafoucrière           | 24       | Site Investigator                                    |
| Anu Bruun                     | 18       | Site Investigator                                    | Umberto Spampinato             | 24       | Site Investigator                                    |
| Paivi Hartikainen             | 18       | Site Investigator                                    | Julien Couttier                | 25       | Site Investigator                                    |
| Seija Mäkipää                 | 18       | Site Investigator                                    | Bérengère Debilly              | 25       | Site Investigator                                    |
| Mari Ollokainen               | 18       | Site Investigator                                    | Christine Delaigue             | 25       | Site Investigator                                    |
| Jaana Åman                    | 19       | Site Investigator                                    | Philippe Derost                | 25       | Site Investigator                                    |
| Mikko Kärppä                  | 19       | Site Investigator                                    | Franck Durif                   | 25       | Site Investigator                                    |
| Jaakko Ignatius               | 20       | Site Investigator                                    | Véronique Germain              | 25       | Site Investigator                                    |
| Outi Jääskeläinen             | 20       | Site Investigator                                    | Perrine Legendre               | 25       | Site Investigator                                    |
| Outi Kajula                   | 20       | Site Investigator                                    | Sylvie Loiseau                 | 25       | Site Investigator                                    |
| Jukka Moilanen                | 20       | Site Investigator                                    | Ana Marques                    | 25       | Site Investigator                                    |
| Aki Mustonen                  | 20       | Site Investigator                                    | Miguel Ulla                    | 25       | Site Investigator                                    |
| Maire Santala                 | 21       | Site Investigator                                    | Tiphaine Vidal                 | 25       | Site Investigator                                    |
| Pia Eklund                    | 22       | Site Investigator                                    | Anne-Catherine<br>Bachoud-Lévi | 26       | Site Investigator,<br>REGISTRY Steering<br>Committee |
| Heli Hiivola                  | 22       | Site Investigator                                    | Farideh Badei                  | 26       | Site Investigator                                    |
| Hannele Hyppönen              | 22       | Site Investigator                                    | Marie-Françoise<br>Boissé      | 26       | Site Investigator                                    |
| Kirsti Martikainen            | 22       | Site Investigator                                    | Lotfi Boudali                  | 26       | Site Investigator                                    |
| Marjut Ojala                  | 22       | Site Investigator                                    | Laurent Cleret de<br>Langavant | 26       | Site Investigator                                    |
| Sirkku Tähtkääpää             | 22       | Site Investigator                                    | Laurie Lemoine                 | 26       | Site Investigator                                    |
| Katri Tuuha                   | 22       | Site Investigator                                    | Graca Morgado                  | 26       | Site Investigator                                    |
| Philippe Allain               | 23       | Site Investigator                                    | Katia Youssov                  | 26       | Site Investigator                                    |
| Dominique Bonneau             | 23       | Site Investigator                                    | Agnès Annic                    | 27       | Site Investigator                                    |

| Name                       | Location | Contribution/Role | Name                  | Location | Contribution/Role |
|----------------------------|----------|-------------------|-----------------------|----------|-------------------|
| Recka Barthélémy           | 27       | Site Investigator | Jean-Philippe Azulay  | 29       | Site Investigator |
| Christelle De Bruycker     | 27       | Site Investigator | Marie Delfini         | 29       | Site Investigator |
| Maryline Cabaret           | 27       | Site Investigator | Alexandre Eusebio     | 29       | Site Investigator |
| Anne-Sophie Carette        | 27       | Site Investigator | Frédérique Fluchere   | 29       | Site Investigator |
| Nicolas Carrière           | 27       | Site Investigator | Aicha Guenam          | 29       | Site Investigator |
| Eric Decorte               | 27       | Site Investigator | Laura Mundler         | 29       | Site Investigator |
| Luc Defebvre               | 27       | Site Investigator | Karine Nguyen         | 29       | Site Investigator |
| Marie Delliaux             | 27       | Site Investigator | Sandra Benaich        | 30       | Site Investigator |
| Arnaud Delval              | 27       | Site Investigator | Alexis Brice          | 30       | Site Investigator |
| Alizé Depelchin            | 27       | Site Investigator | Sarah Boster          | 30       | Site Investigator |
| Alain Destee               | 27       | Site Investigator | Perrine Charles       | 30       | Site Investigator |
| Nelly Dewulf-Pasz          | 27       | Site Investigator | Alexandra Durr        | 30       | Site Investigator |
| Thibaut Dondaine           | 27       | Site Investigator | Claire Ewencyk        | 30       | Site Investigator |
| Florence Dugauquier        | 27       | Site Investigator | Hélène Francisque     | 30       | Site Investigator |
| Kathy Dujardin             | 27       | Site Investigator | Céline Jauffret       | 30       | Site Investigator |
| Lucie Hopes                | 27       | Site Investigator | Damian Justo          | 30       | Site Investigator |
| Pierre Krystkowiak         | 27,28    | Site Investigator | Abdulrahman Kassar    | 30       | Site Investigator |
| Marie-Hélène Lemaire       | 27       | Site Investigator | Stephan Klebe         | 30,51    | Site Investigator |
| Sylvie Manouvrier          | 27       | Site Investigator | Fabien Lesne          | 30       | Site Investigator |
| Eugénie Mutez              | 27       | Site Investigator | Paolo Milani          | 30       | Site Investigator |
| Mireille Peter             | 27       | Site Investigator | Marie-Lorraine Monin  | 30       | Site Investigator |
| Lucie Plomhause            | 27       | Site Investigator | Tiffany Monnier       | 30       | Site Investigator |
| Bernard Sablonnière        | 27       | Site Investigator | Emmanuel Roze         | 30       | Site Investigator |
| Clémence Simonin           | 27       | Site Investigator | Alina Tataru          | 30       | Site Investigator |
| Céline Tard                | 27       | Site Investigator | Maya Tchikviladzé     | 30       | Site Investigator |
| Stéphanie Thibault-Tanchou | 27       | Site Investigator | Sandrine Bioux        | 31       | Site Investigator |
| Isabelle Vuillaume         | 27       | Site Investigator | Evangelina Blioux     | 31       | Site Investigator |
| Marcellin Bellonet         | 28       | Site Investigator | Carole Girard         | 31       | Site Investigator |
| Stéphanie Blin             | 28       | Site Investigator | Lucie Guyant-Maréchal | 31       | Site Investigator |
| Simone Chen                | 28       | Site Investigator | Didier Hannequin      | 31       | Site Investigator |
| Kamel Masmoudi             | 28       | Site Investigator | Véronique Hannier     | 31       | Site Investigator |
| Gilles Morin               | 28       | Site Investigator | Séverine Jourdain     | 31       | Site Investigator |
| Martine Roussel            | 28       | Site Investigator | David Maltête         | 31       | Site Investigator |
| Mélissa Tir                | 28       | Site Investigator | Dorothee Poulouen     | 31       | Site Investigator |
| Béatrice Schüler           | 28       | Site Investigator | Mathieu Anheim        | 32       | Site Investigator |
| Sandrine Wannepain         | 28       | Site Investigator | Nadia Barun           | 32       | Site Investigator |
| Yassine Zoutina            | 28       | Site Investigator | Ouhaid Lagha-Boukbiza | 32       | Site Investigator |

| Name                          | Location | Contribution/Role | Name               | Location | Contribution/Role                                    |
|-------------------------------|----------|-------------------|--------------------|----------|------------------------------------------------------|
| Nadine Longato                | 32       | Site Investigator | Barbara Kaminski   | 36       | Site Investigator                                    |
| Christophe Marcel             | 32       | Site Investigator | Peter Kraus        | 36       | Site Investigator                                    |
| Clélie Phillipps              | 32       | Site Investigator | Carsten Saft       | 36       | Site Investigator,<br>REGISTRY Steering<br>Committee |
| Gabrielle Rudolf              | 32       | Site Investigator | Christiane Stamm   | 36       | Site Investigator                                    |
| Gisèle Steinmetz              | 32       | Site Investigator | Christos Ganos     | 37,42    | Site Investigator                                    |
| Christine Tranchant           | 32       | Site Investigator | Lars Stubbe        | 37,42    | Site Investigator                                    |
| Caroline Wagner               | 32       | Site Investigator | Vera Tadic         | 37       | Site Investigator                                    |
| Marie-Agathe<br>Zimmermann    | 32       | Site Investigator | Jennifer Tübing    | 37       | Site Investigator                                    |
| Leily Blondeau                | 33       | Site Investigator | Herwig Lange       | 38,48    | Site Investigator                                    |
| Fabienne Calvas               | 33       | Site Investigator | Cecile Bosredon    | 39       | Site Investigator                                    |
| Samia Cheriet                 | 33       | Site Investigator | Ulrike Hunger      | 39       | Site Investigator                                    |
| Helène Delabaere              | 33       | Site Investigator | Matthias Löhle     | 39       | Site Investigator                                    |
| Jean-François<br>Demonet      | 33       | Site Investigator | Antonia Maass      | 39       | Site Investigator                                    |
| Laurent Marquine              | 33       | Site Investigator | Christiana Ossig   | 39       | Site Investigator                                    |
| Jérémie Pariente              | 33       | Site Investigator | Simone Schmidt     | 39       | Site Investigator                                    |
| Michèle Pierre                | 33       | Site Investigator | Alexander Storch   | 39       | Site Investigator                                    |
| Elsa Pomies                   | 33       | Site Investigator | Annett Wolz        | 39       | Site Investigator                                    |
| Sandrine Rolland              | 33       | Site Investigator | Martin Wolz        | 39       | Site Investigator                                    |
| Corinne Souyris               | 33       | Site Investigator | Zacharias Kohl     | 40       | Site Investigator                                    |
| Christoph Michael<br>Kosinski | 34       | Site Investigator | Christina Kozay    | 40       | Site Investigator                                    |
| Eva Milkereit                 | 34       | Site Investigator | Jürgen Winkler     | 40       | Site Investigator                                    |
| Daniela Probst                | 34       | Site Investigator | Ulrike Bergmann    | 41       | Site Investigator                                    |
| Kathrin Reetz                 | 34       | Site Investigator | Regina Böringer    | 41       | Site Investigator                                    |
| Christian Sass                | 34,48    | Site Investigator | Philipp Capetian   | 41       | Site Investigator                                    |
| Johannes Schiefer             | 34       | Site Investigator | Gerit Kammel       | 41       | Site Investigator                                    |
| Christiane Schlangen          | 34       | Site Investigator | Johann Lambeck     | 41       | Site Investigator                                    |
| Cornelius J. Werner           | 34       | Site Investigator | Miriam Mächtel     | 41       | Site Investigator                                    |
| Markus Beuth                  | 35       | Site Investigator | Simone Meier       | 41       | Site Investigator                                    |
| Harald Gelderblom             | 35       | Site Investigator | Michel Rijntjes    | 41       | Site Investigator                                    |
| Josef Priller                 | 35       | Site Investigator | Birgit Zucker      | 41       | Site Investigator                                    |
| Harald Prüß                   | 35       | Site Investigator | Kai Boelmans       | 42       | Site Investigator                                    |
| Eike Spruth                   | 35       | Site Investigator | Ines Goerendt      | 42       | Site Investigator                                    |
| Silvia Thiel                  | 35       | Site Investigator | Walburgis Heinicke | 42       | Site Investigator                                    |
| Jürgen Andrich                | 36       | Site Investigator | Ute Hidding        | 42       | Site Investigator                                    |
| Gisa Ellrichmann              | 36       | Site Investigator | Jan Lewerenz       | 42,50    | Site Investigator                                    |
| Lennard Herrmann              | 36       | Site Investigator | Alexander Münchau  | 42       | Site Investigator                                    |
| Rainer Hoffmann               | 36       | Site Investigator | Michael Orth       | 42,50    | Site Investigator                                    |

| Name                 | Location | Contribution/Role | Name                           | Location | Contribution/Role                                    |
|----------------------|----------|-------------------|--------------------------------|----------|------------------------------------------------------|
| Jenny Schmalfeld     | 42       | Site Investigator | Katrin Barth                   | 50       | Site Investigator                                    |
| Simone Zittel        | 42       | Site Investigator | Andrea Buck                    | 50       | Site Investigator                                    |
| Gabriele Diercks     | 43       | Site Investigator | Julia Connemann                | 50       | Site Investigator                                    |
| Dirk Dressler        | 43       | Site Investigator | Daniel Ecker                   | 50,163   | Site Investigator,<br>Language<br>Coordinator        |
| Flyverly Francis     | 43       | Site Investigator | Carolin Geitner                | 50       | Site Investigator                                    |
| Sabine Gayde-Stephan | 43       | Site Investigator | Christine Held                 | 50,163   | Site Investigator,<br>Language<br>Coordinator        |
| Heike Gorzolla       | 43       | Site Investigator | Andrea Kesse                   | 50       | Site Investigator                                    |
| Bianca Kramer        | 43       | Site Investigator | G. Bernhard<br>Landwehrmeyer   | 50       | Site Investigator,<br>REGISTRY Steering<br>Committee |
| Rebecca Minschke     | 43       | Site Investigator | Franziska Lezius               | 50       | Site Investigator                                    |
| Christoph Schrader   | 43       | Site Investigator | Solveig Nepper                 | 50       | Site Investigator                                    |
| Pawel Tacik          | 43       | Site Investigator | Anke Niess                     | 50       | Site Investigator                                    |
| Michael Ribbat+      | 44       | Site Investigator | Ariane Schneider               | 50       | Site Investigator                                    |
| Bernhard Longinus    | 45       | Site Investigator | Daniela Schwenk                | 50       | Site Investigator                                    |
| Carsten Möller       | 46       | Site Investigator | Sigurd Süßmuth                 | 50       | Site Investigator                                    |
| Katrin Bürk          | 46       | Site Investigator | Sonja Trautmann                | 50       | Site Investigator                                    |
| Antje Lüsebrink      | 47       | Site Investigator | Melanie Vogel                  | 50       | Site Investigator                                    |
| Mark Mühlau          | 47       | Site Investigator | Patrick Weydt                  | 50       | Site Investigator                                    |
| Alexander Peinemann  | 47       | Site Investigator | Thomas Musacchio               | 51       | Site Investigator                                    |
| Michael Städtler     | 47       | Site Investigator | Christine Leybold              | 51       | Site Investigator                                    |
| Adolf Weindl         | 47       | Site Investigator | Kerstin Nöth                   | 51       | Site Investigator                                    |
| Juliane Winkelmann   | 47       | Site Investigator | Claudia Cormio                 | 52       | Site Investigator                                    |
| Cornelia Ziegler     | 47       | Site Investigator | Olimpia Difruscolo             | 52       | Site Investigator                                    |
| Natalie Bechtel      | 48       | Site Investigator | Giovanni Franco                | 52       | Site Investigator                                    |
| Heike Beckmann       | 48       | Site Investigator | Angela Nuzzi                   | 52       | Site Investigator                                    |
| Stefan Bohlen        | 48       | Site Investigator | Vittorio Scirucchio            | 52       | Site Investigator                                    |
| Nicole Göpfert       | 48       | Site Investigator | Claudia Serpino                | 52       | Site Investigator                                    |
| Eva Hölzner          | 48       | Site Investigator | Marina de Tommaso              | 52       | Site Investigator                                    |
| Ralf Reilmann        | 48       | Site Investigator | Giovanna Calandra-<br>Buonaura | 53       | Site Investigator                                    |
| Stefanie Rohm        | 48       | Site Investigator | Sabina Capellari               | 53       | Site Investigator                                    |
| Silke Rumpf          | 48       | Site Investigator | Pietro Cortelli                | 53       | Site Investigator                                    |
| Sigrun Schepers      | 48       | Site Investigator | Roberto Gallassi               | 53       | Site Investigator                                    |
| Nathalia Weber       | 48       | Site Investigator | Roberto Poda                   | 53       | Site Investigator                                    |
| Michael Bachmeier    | 49       | Site Investigator | Cesa Scaglione                 | 53       | Site Investigator                                    |
| Matthias Dose        | 49       | Site Investigator | Chiara Agosti                  | 54       | Site Investigator                                    |
| Nina Hofstetter      | 49       | Site Investigator | Sergio Barlati                 | 54       | Site Investigator                                    |
| Ralf Marquard        | 49       | Site Investigator | Silvia Compostella             | 54       | Site Investigator                                    |
| Alzbeta Mühlbäck     | 49       | Site Investigator | Eleonora Marchina              | 54       | Site Investigator                                    |

| Name                        | Location | Contribution/Role                             | Name                  | Location | Contribution/Role                                    |
|-----------------------------|----------|-----------------------------------------------|-----------------------|----------|------------------------------------------------------|
| Alessandro Padovani         | 54       | Site Investigator                             | Francesca Spagnolo    | 58       | Site Investigator                                    |
| Michela Figorilli           | 55       | Site Investigator                             | Franco Taroni         | 58       | Site Investigator                                    |
| Francesco Marrosu           | 55       | Site Investigator                             | Chiara Tomasello      | 58       | Site Investigator                                    |
| Antonella Muroi             | 55       | Site Investigator                             | Giuseppe De Michele   | 59       | Site Investigator                                    |
| Valeria Piras               | 55       | Site Investigator                             | Luigi Di Maio         | 59       | Site Investigator                                    |
| Melisa Vacca                | 55       | Site Investigator                             | Carlo Rinaldi         | 59       | Site Investigator                                    |
| Elisabetta Bertini          | 56       | Site Investigator                             | Marco Massarelli      | 59       | Site Investigator                                    |
| Caterina Bartoli            | 56       | Site Investigator                             | Silvio Peluso         | 59       | Site Investigator                                    |
| Fernanda Fortunato          | 56       | Site Investigator                             | Alessandro Roca       | 59       | Site Investigator                                    |
| Elena Ghelli                | 56       | Site Investigator                             | Cinzia Valeria Russo  | 59       | Site Investigator                                    |
| Andrea Ginestroni           | 56       | Site Investigator                             | Elena Salvatore       | 59       | Site Investigator                                    |
| Claudia Mechi               | 56       | Site Investigator                             | Pierpaolo Sorrentino  | 59       | Site Investigator                                    |
| Marco Paganini              | 56       | Site Investigator                             | Tecla Tucci           | 59       | Site Investigator                                    |
| Silvia Piacentini           | 56       | Site Investigator                             | Milena Cannella       | 60       | Site Investigator                                    |
| Silvia Pradella             | 56       | Site Investigator                             | Valentina Codella     | 60       | Site Investigator                                    |
| Anna Maria Romoli           | 56       | Site Investigator                             | Francesca De Gregorio | 60       | Site Investigator                                    |
| Sandro Sorbi                | 56       | Site Investigator                             | Annunziata De Nicola  | 60       | Site Investigator                                    |
| Giovanni Abbruzzese         | 57       | Site Investigator                             | Francesca Elifani     | 60       | Site Investigator                                    |
| Monica Bandettini di Poggio | 57       | Site Investigator                             | Chiara Esposito       | 60       | Site Investigator                                    |
| Giovanna Ferrandes          | 57       | Site Investigator                             | Tiziana Martino       | 60       | Site Investigator                                    |
| Paola Mandich               | 57       | Site Investigator                             | Irene Mazzante        | 60       | Site Investigator                                    |
| Roberta Marchese            | 57       | Site Investigator                             | Martina Petrollini    | 60       | Site Investigator                                    |
| Emilio Di Maria             | 57       | Site Investigator                             | Maria Simonelli       | 60       | Site Investigator                                    |
| Tiziano Tamburini           | 57       | Site Investigator                             | Maurizio Veza         | 60       | Site Investigator                                    |
| Alberto Albanese            | 58       | Site Investigator                             | Ferdinando Squitieri  | 61       | Site Investigator                                    |
| Simona Castagliuolo         | 58       | Site Investigator                             | Barbara D'Alessio     | 62       | Site Investigator                                    |
| Anna Castaldo               | 58       | Site Investigator                             | Francesca Lovo        | 62       | Site Investigator                                    |
| Stefano Di Donato           | 58       | Site Investigator                             | Anna Rita Bentivoglio | 63       | Site Investigator,<br>REGISTRY Steering<br>Committee |
| Daniela Di Bella            | 58       | Site Investigator                             | Francesco Bove        | 63       | Site Investigator                                    |
| Cinzia Gellera              | 58       | Site Investigator                             | Claudio Catalli       | 63       | Site Investigator                                    |
| Silvia Genitrini            | 58       | Site Investigator                             | Raffaella Di Giacopo  | 63       | Site Investigator                                    |
| Caterina Mariotti           | 58       | Site Investigator                             | Alfonso Fasano        | 63       | Site Investigator                                    |
| Daniela Monza               | 58,163   | Site Investigator,<br>Language<br>Coordinator | Marina Frontali       | 63,64    | Site Investigator                                    |
| Lorenzo Nanetti             | 58       | Site Investigator                             | Arianna Guidubaldi    | 63       | Site Investigator                                    |
| Marta Panzeri               | 58       | Site Investigator                             | Tamara Ialongo        | 63       | Site Investigator                                    |
| Dominga Paridi              | 58       | Site Investigator                             | Gioia Jacopini        | 63,64    | Site Investigator                                    |
| Paola Soliveri              | 58       | Site Investigator                             | Giovanna Loria        | 63       | Site Investigator                                    |

| Name                           | Location  | Contribution/Role                                    | Name                          | Location | Contribution/Role                                    |
|--------------------------------|-----------|------------------------------------------------------|-------------------------------|----------|------------------------------------------------------|
| Anna Modoni                    | 63        | Site Investigator                                    | Mirella Waber                 | 68       | Site Investigator                                    |
| Martina Petracca               | 63        | Site Investigator                                    | Carla Verstappen              | 69       | Site Investigator                                    |
| Carla Piano                    | 63        | Site Investigator                                    | Ellen Økland<br>Blinkenberg   | 70       | Site Investigator                                    |
| Piccininni Chiara              | 63        | Site Investigator                                    | Erik Hauge                    | 71       | Site Investigator                                    |
| Davide Quaranta                | 63        | Site Investigator                                    | Hilde Tyvoll                  | 71       | Site Investigator                                    |
| Silvia Romano                  | 63,64     | Site Investigator                                    | Olaf Aaserud                  | 72       | Site Investigator                                    |
| Francesco Soleti               | 63        | Site Investigator                                    | Nils Olaf Aanonsen            | 72       | Site Investigator                                    |
| Marcella Solito                | 63        | Site Investigator                                    | Kathrine Bjørgo               | 72       | Site Investigator                                    |
| Maria Spadaro                  | 63        | Site Investigator                                    | Nancy Borgerød                | 72       | Site Investigator                                    |
| Flavia Torlizzi                | 63        | Site Investigator                                    | Elisabeth Dramstad            | 72       | Site Investigator                                    |
| Paola Zinzi                    | 63,64,163 | Site Investigator,<br>Language<br>Coordinator        | Madeleine Fannemel            | 72       | Site Investigator                                    |
| Giulia Coarelli                | 64        | Site Investigator                                    | Jan C. Frich                  | 72       | Site Investigator,<br>REGISTRY<br>Steering Committee |
| Michela Ferraldeschi           | 64        | Site Investigator                                    | Per F. Gørvell                | 72       | Site Investigator                                    |
| Giovanni Ristori               | 64        | Site Investigator                                    | Kathrine Haggag               | 72       | Site Investigator                                    |
| Monique S.E. van<br>Hout       | 65        | Site Investigator                                    | Cecilie Haggag<br>Johannessen | 72       | Site Investigator                                    |
| Jeroen P.P. van Vugt           | 65        | Site Investigator                                    | Arvid Heiberg                 | 72       | Site Investigator,<br>REGISTRY<br>Steering Committee |
| A. Marit de Weert              | 65        | Site Investigator                                    | Lars Retterstøl               | 72       | Site Investigator                                    |
| Marloes Verhoeven              | 65        | Site Investigator                                    | Oddveig Røsby                 | 72       | Site Investigator                                    |
| Meike Dekker                   | 66        | Site Investigator                                    | Jutta Rummel                  | 72       | Site Investigator                                    |
| Jesper Klooster                | 66        | Site Investigator                                    | Alma Sikiric                  | 72       | Site Investigator                                    |
| Nico Leenders                  | 66        | Site Investigator                                    | Bodil Stokke                  | 72       | Site Investigator                                    |
| Joost van Oostrom              | 66        | Site Investigator                                    | Marleen van Walsem            | 72       | Site Investigator                                    |
| Berry Kremer                   | 66,69     | Site Investigator                                    | Ragnhild Wehus                | 72       | Site Investigator                                    |
| Verena Baake                   | 67        | Site Investigator                                    | Vibeke Arntsen                | 73       | Site Investigator                                    |
| Simon J. A. van den<br>Bogaard | 67        | Site Investigator                                    | Inga Bjørnevoll               | 73       | Site Investigator                                    |
| Reineke Bos                    | 67,163    | Site Investigator,<br>Language<br>Coordinator        | Sigrid Botne Sando            | 73       | Site Investigator                                    |
| Eve M. Dumas                   | 67        | Site Investigator                                    | Marte Gjøøl Haug              | 73       | Site Investigator                                    |
| Ellen P. 't Hart               | 67        | Site Investigator                                    | Hanna Haugan<br>Størseth      | 73       | Site Investigator                                    |
| Marye Hogenboom                | 67        | Site Investigator                                    | Rune Østern                   | 73       | Site Investigator                                    |
| Milou Jacobs                   | 67        | Site Investigator                                    | Julie Paulsen                 | 73       | Site Investigator                                    |
| Caroline Jurgens               | 67        | Site Investigator                                    | Artur Dziadkiewicz            | 74       | Site Investigator                                    |
| Anne Kampstra                  | 67        | Site Investigator                                    | Agnieszka Konkel              | 74       | Site Investigator                                    |
| Raymund A.C. Roos              | 67        | Site Investigator,<br>REGISTRY Steering<br>Committee | Ewa Narożańska                | 74       | Site Investigator                                    |
| Anne Schoonderbeek             | 67        | Site Investigator                                    | Malgorzata Nowak              | 74       | Site Investigator                                    |
| Marie-Noëlle Witjes-<br>Ané    | 67        | Site Investigator                                    | Piotr Robowski                | 74       | Site Investigator                                    |
| Annelien Duits                 | 68        | Site Investigator                                    | Emilia Sitek                  | 74       | Site Investigator                                    |
| Mayke Oosterloo                | 68        | Site Investigator                                    | Jaroslav Slawek               | 74       | Site Investigator                                    |

| Name                             | Location | Contribution/Role | Name                      | Location | Contribution/Role                                                                       |
|----------------------------------|----------|-------------------|---------------------------|----------|-----------------------------------------------------------------------------------------|
| Witold Soltan                    | 74       | Site Investigator | Anna Kaminska             | 78       | Site Investigator                                                                       |
| Michał Szinwelski                | 74       | Site Investigator | Hubert Kwiecinski+        | 78       | Site Investigator                                                                       |
| Michał Arkuszewski               | 75       | Site Investigator | Jakub Antczak             | 79       | Site Investigator                                                                       |
| Magdalena Błaszczyk              | 75       | Site Investigator | Katarzyna Jachinska       | 79       | Site Investigator                                                                       |
| Magdalena Boczarska-Jedynak      | 75       | Site Investigator | Wioletta Krysa            | 79       | Site Investigator                                                                       |
| Ewelina Ciach-Wysocka            | 75       | Site Investigator | Maryla Rakowicz           | 79       | Site Investigator                                                                       |
| Agnieszka Gorzkowska             | 75       | Site Investigator | Rafał Rola                | 79       | Site Investigator                                                                       |
| Barbara Jasińska-Myga            | 75       | Site Investigator | Danuta Ryglewicz          | 79       | Site Investigator                                                                       |
| Aleksandra Kaczmarczyk           | 75       | Site Investigator | Halina Sienkiewicz-Jarosz | 79       | Site Investigator                                                                       |
| Gabriela Kłodowska – Duda        | 75       | Site Investigator | Iwona Stępnia             | 79       | Site Investigator                                                                       |
| Grzegorz Opala                   | 75       | Site Investigator | Anna Sulek                | 79       | Site Investigator                                                                       |
| Monika Rudzińska                 | 75,76    | Site Investigator | Grzegorz Witkowski        | 79,163   | Site Investigator, Language Coordinator, Site Investigator, REGISTRY Steering Committee |
| Daniel Stempel                   | 75       | Site Investigator | Jacek Zaremba             | 79       | Site Investigator                                                                       |
| Krzysztof Banaszkiwicz           | 76       | Site Investigator | Elzbieta Zdzienicka       | 79       | Site Investigator                                                                       |
| Dorota Boćwińska                 | 76       | Site Investigator | Karolina Ziara-Jakutowicz | 79       | Site Investigator                                                                       |
| Kamila Bojakowska-Jaremek        | 76       | Site Investigator | Cristina Januário         | 80       | Site Investigator                                                                       |
| Małgorzata Dec                   | 76       | Site Investigator | Filipa Júlio              | 80       | Site Investigator                                                                       |
| Natalia Grabska                  | 76       | Site Investigator | Manuel Almeida            | 81       | Site Investigator                                                                       |
| Małgorzata Krawczyk              | 76       | Site Investigator | Ana Calado                | 81       | Site Investigator                                                                       |
| Ewelina Kubowicz                 | 76       | Site Investigator | Margarida Dias            | 81       | Site Investigator                                                                       |
| Michalina Malec-Litwinowicz      | 76       | Site Investigator | Joana Morgado             | 81       | Site Investigator                                                                       |
| Agata Stenwak                    | 76       | Site Investigator | Cristina Semedo           | 81       | Site Investigator                                                                       |
| Andrzej Szczudlik                | 76       | Site Investigator | Leonor Correia Guedes     | 82,163   | Site Investigator, Language Coordinator                                                 |
| Elżbieta Szczygieł               | 76       | Site Investigator | Miguel Coelho             | 82       | Site Investigator                                                                       |
| Magdalena Wójcik                 | 76       | Site Investigator | Joaquim J Ferreira        | 82       | Site Investigator, REGISTRY Steering Committee                                          |
| Anna Wasielewska                 | 76       | Site Investigator | Andreia Magalhães         | 82       | Site Investigator                                                                       |
| Jacek Anioła Anna Bryl           | 77       | Site Investigator | Tiago Mestre              | 82,163   | Site Investigator, Language Coordinator                                                 |
| Anna Ciesielska                  | 77       | Site Investigator | Tiago Mendes              | 82,83    | Site Investigator                                                                       |
| Aneta Klimberg                   | 77       | Site Investigator | Dulce Neutel              | 82       | Site Investigator                                                                       |
| Jerzy Marcinkowski               | 77       | Site Investigator | Filipe Rodrigues          | 82       | Site Investigator                                                                       |
| Husam Samara                     | 77       | Site Investigator | Anabela Valadas           | 82       | Site Investigator                                                                       |
| Justyna Sempołowicz              | 77       | Site Investigator | Cristina Costa            | 83       | Site Investigator                                                                       |
| Bartłomiej Wiśniewski            | 77       | Site Investigator | Helena Cardoso            | 83       | Site Investigator                                                                       |
| Daniel Zielonka                  | 77       | Site Investigator | Mariana Santos            | 83       | Site Investigator                                                                       |
| Anna Gogol (formerly Kalbarczyk) | 78       | Site Investigator | Gonçalo Cação             | 84       | Site Investigator                                                                       |
| Piotr Janik                      | 78       | Site Investigator | Sara Cavaco               | 84       | Site Investigator                                                                       |
| Zygmunt Jamrozik                 | 78       | Site Investigator | Joana Damásio             | 84       | Site Investigator                                                                       |



| Name                     | Location | Contribution/Role                              | Name                           | Location | Contribution/Role                              |
|--------------------------|----------|------------------------------------------------|--------------------------------|----------|------------------------------------------------|
| Joana Fernandes          | 84       | Site Investigator                              | Andrés de la Cerda Santa María | 94       | Site Investigator                              |
| Alexandra Gonçalves      | 84       | Site Investigator                              | Esteban Muñoz                  | 94       | Site Investigator                              |
| Rui Loureiro             | 84       | Site Investigator                              | Pilar Santacruz                | 94       | Site Investigator                              |
| Inês Moreira             | 84       | Site Investigator                              | Miquel Aguilar Barbera         | 95       | Site Investigator                              |
| Marina Magalhães         | 84       | Site Investigator                              | Ana Rojo Sebastián             | 95       | Site Investigator, REGISTRY Steering Committee |
| Paula Salgado            | 84       | Site Investigator                              | Sonia Arribas Pardo            | 95       | Site Investigator                              |
| Carlos Andrade           | 85       | Site Investigator                              | Dolors Badenes Guia            | 95       | Site Investigator                              |
| Andreia Costa            | 85       | Site Investigator                              | Noemi Calzado                  | 95       | Site Investigator                              |
| Carolina Garrett         | 85       | Site Investigator                              | Laura Casas Hernanz            | 95       | Site Investigator                              |
| Miguel Gago              | 85       | Site Investigator                              | Juan Pablo Tartari Díaz-Zorita | 95       | Site Investigator                              |
| Joana Guimarães          | 85       | Site Investigator                              | Judit López Catena             | 95       | Site Investigator                              |
| João Massano             | 85       | Site Investigator                              | Pilar Quiléz Ferrer            | 95       | Site Investigator                              |
| Joana Meireles           | 85       | Site Investigator                              | Gemma Tome Carruesco           | 95       | Site Investigator                              |
| Ana Monteiro             | 85       | Site Investigator                              | Misericordia Floriach Robert   | 96       | Site Investigator                              |
| Diana Khasanova          | 86       | Site Investigator                              | Cèlia Mareca Viladrich         | 96       | Site Investigator                              |
| Zuleykha Zalyalova       | 86       | Site Investigator                              | Elvira Roca                    | 96       | Site Investigator                              |
| Sergey Illarioshkin      | 87       | Site Investigator, REGISTRY Steering Committee | Jesús Miguel Ruiz Idiago       | 96       | Site Investigator                              |
| Sergey Klyushnikov       | 87       | Site Investigator                              | Antonio Villa Riballo          | 96       | Site Investigator                              |
| Olga Sidorova            | 87       | Site Investigator                              | Antonia Campolongo             | 97       | Site Investigator                              |
| Oleg Smirnov             | 87       | Site Investigator                              | Ramon Fernandez de Bobadilla   | 97       | Site Investigator                              |
| Elizaveta Yudina         | 87,163   | Site Investigator, Language Coordinator        | Andrea Horta                   | 97,163   | Site Investigator, Language Coordinator        |
| Yury Seliverstov         | 87,163   | Site Investigator, Language Coordinator        | Jaime Kulisevsky Bojarsky      | 97       | Site Investigator                              |
| Victoria Antonova        | 88       | Site Investigator                              | Saul Martinez-Horta            | 97,163   | Site Investigator, Language Coordinator        |
| Svetlana Kopishinskaya   | 88       | Site Investigator                              | Javier Pagonabarraga           | 97       | Site Investigator                              |
| Maria Korotysh           | 88       | Site Investigator                              | Jesus Perez Perez              | 97       | Site Investigator                              |
| Rim Magzhanov            | 89       | Site Investigator                              | Roser Ribosa                   | 97       | Site Investigator                              |
| Elena Saifullina         | 89       | Site Investigator                              | Carolina Villa                 | 97       | Site Investigator                              |
| Sergey Kurbatov          | 90       | Site Investigator                              | Maria Angeles Acera Gil        | 98       | Site Investigator                              |
| Pilar Solis              | 91       | Site Investigator                              | Koldo Berganzo Corrales        | 98       | Site Investigator                              |
| Carmen Durán Herrera     | 92       | Site Investigator                              | Juan Carlos Gomez Esteban      | 98       | Site Investigator                              |
| Patrocinio Garcia Moreno | 92       | Site Investigator                              | Amaia González                 | 98       | Site Investigator                              |
| Jordi Bas                | 93       | Site Investigator                              | Beatriz Tijero Merino          | 98       | Site Investigator                              |
| Núria Busquets           | 93       | Site Investigator                              | Esther Cubo                    | 99       | Site Investigator                              |
| Matilde Calopa           | 93       | Site Investigator                              | Cecilia Gil Polo               | 99       | Site Investigator                              |
| Serge Jaumà Classen      | 93       | Site Investigator                              | Natividad Mariscal             | 99       | Site Investigator                              |
| Nadia Rodríguez Dedichá  | 93       | Site Investigator                              | Jesús Sánchez                  | 99       | Site Investigator                              |
| María Teresa Buongiorno  | 94       | Site Investigator                              | Sandra Gutierrez Romero        | 100      | Site Investigator                              |

| Name                          | Location    | Contribution/Role                       | Name                            | Location | Contribution/Role                              |
|-------------------------------|-------------|-----------------------------------------|---------------------------------|----------|------------------------------------------------|
| José Matías Arbelo            | 100         | Site Investigator                       | Esther Diéguez                  | 107      | Site Investigator                              |
| Rocío Malo de Molina          | 100         | Site Investigator                       | Lorenza Fortuna                 | 107      | Site Investigator                              |
| Idaira Martín                 | 100         | Site Investigator                       | Agustina Legaz                  | 107      | Site Investigator                              |
| Juan Manuel Periañez          | 100         | Site Investigator                       | Salvadora Manzanares            | 107      | Site Investigator                              |
| Beatriz Udaeta                | 100         | Site Investigator                       | Juan Marín Muñoz                | 107      | Site Investigator                              |
| Fernando Alonso-Frech         | 101         | Site Investigator                       | María Martirio Antequera Torres | 107      | Site Investigator                              |
| María del Valle Loarte        | 101         | Site Investigator                       | Fuensanta Noguera Perea         | 107      | Site Investigator                              |
| Francisco Barrero             | 102         | Site Investigator                       | Laura Vivancos                  | 107      | Site Investigator                              |
| Blas Morales                  | 102         | Site Investigator                       | Sonia González                  | 108      | Site Investigator                              |
| Belén Frades                  | 103         | Site Investigator                       | Luis Menéndez Guisasola         | 108      | Site Investigator                              |
| Marina Ávila Villanueva       | 103         | Site Investigator                       | Marta Para Prieto               | 108      | Site Investigator                              |
| María Ascension Zea Sevilla   | 103         | Site Investigator                       | René Ribacoba                   | 108      | Site Investigator                              |
| María del Mar Fenollar        | 104         | Site Investigator                       | Carlos Salvador                 | 108      | Site Investigator                              |
| Rocío García-Ramos García     | 104         | Site Investigator                       | Pablo Sánchez Lozano            | 108      | Site Investigator                              |
| Clara Villanueva              | 104         | Site Investigator                       | Inés Legarda Ramirez            | 109      | Site Investigator                              |
| Mónica Bascuñana              | 105         | Site Investigator                       | Dolors Moragues Benito          | 109      | Site Investigator                              |
| Marta Fatás Ventura           | 105         | Site Investigator                       | Penelope Navas Arques           | 109      | Site Investigator                              |
| Juan García Caldentey         | 105,106,109 | Site Investigator                       | Monica Rodriguez Lopera         | 109      | Site Investigator                              |
| Guillermo García Ribas        | 105         | Site Investigator                       | Barbara Vives Pastor            | 109      | Site Investigator                              |
| Justo García de Yébenes       | 105         | Site Investigator                       | Itziar Gaston                   | 110      | Site Investigator                              |
| José Luis López-Sendón Moreno | 105         | Site Investigator                       | Fermin Garcia-Amigot            | 110      | Site Investigator                              |
| Verónica Mañanes Barral       | 105         | Site Investigator                       | María Dolores Martinez-Jaurieta | 110      | Site Investigator                              |
| Patricia Trigo Cubillo        | 105,163     | Site Investigator, Language Coordinator | María Antonia Ramos-Arroyo      | 110      | Site Investigator, REGISTRY Steering Committee |
| Cici Feliz                    | 106         | Site Investigator                       | Astrid Adarmes                  | 111      | Site Investigator                              |
| Pedro José García Ruíz        | 106         | Site Investigator                       | Maravilla Bernal-Escudero       | 111      | Site Investigator                              |
| Ana García                    | 106         | Site Investigator                       | Fátima Carrillo                 | 111      | Site Investigator                              |
| Rosa Guerrero López           | 106         | Site Investigator                       | Silvia Jesús                    | 111      | Site Investigator                              |
| Antonio Herranz Bárcenas      | 106         | Site Investigator                       | Pablo Mir                       | 111      | Site Investigator                              |
| Asunción Martínez-Descals     | 106,163     | Site Investigator, Language Coordinator | Laura Vargas-González           | 111      | Site Investigator                              |
| Angel Martínez Pueyo          | 106         | Site Investigator                       | Fátima Damas Hermoso            | 112      | Site Investigator                              |
| Veronica Puertas Martín       | 106         | Site Investigator                       | José Manuel García Moreno       | 112      | Site Investigator                              |
| Noelia Rodríguez Martínez     | 106         | Site Investigator                       | Javier Abril Jaramillo          | 112      | Site Investigator                              |
| Teresa Montojo                | 106         | Site Investigator                       | Carolina Mendez Lucena          | 112      | Site Investigator                              |
| María José Sainz Artiga       | 106         | Site Investigator                       | Eva María Pacheco Cortegana     | 112      | Site Investigator                              |
| Vicenta Sánchez               | 106         | Site Investigator                       | José Chacón Peña                | 112      | Site Investigator                              |
| María Dolores Alarcón         | 107         | Site Investigator                       | Luis Redondo                    | 112      | Site Investigator                              |
| Carmen Antúnez Almagro        | 107         | Site Investigator                       | Violeta Sánchez Sánchez         | 112      | Site Investigator                              |

| Name                          | Location | Contribution/Role                              | Name                 | Location | Contribution/Role                              |
|-------------------------------|----------|------------------------------------------------|----------------------|----------|------------------------------------------------|
| Cristina Melgar Fernandez     | 113      | Site Investigator                              | Tina Wallden         | 119      | Site Investigator                              |
| María Dolores Romero Lemos    | 113      | Site Investigator                              | Måns Berglund        | 120      | Site Investigator                              |
| Maite Paredes Mata            | 113      | Site Investigator                              | Ghada Loutfi         | 120      | Site Investigator                              |
| Rocío Villagrán Casado        | 113      | Site Investigator                              | Carina Olofsson      | 120      | Site Investigator                              |
| Maria Bosca                   | 114      | Site Investigator                              | Eva-Lena Stattin     | 120      | Site Investigator                              |
| Juan Andres Burguera          | 114      | Site Investigator                              | Laila Westman        | 120      | Site Investigator                              |
| Francisco Castera Brugada     | 114      | Site Investigator                              | Birgitta Wikström    | 120      | Site Investigator                              |
| Jose Maria Millán Salvador    | 114      | Site Investigator                              | Camilla Ekwall       | 121      | Site Investigator                              |
| Carmen Peiró Vilaplana        | 114      | Site Investigator                              | Marie-Lousie Göller  | 121      | Site Investigator                              |
| Pilar Solís                   | 114      | Site Investigator                              | Anders Johansson     | 121      | Site Investigator                              |
| Begoña Jeweinat Figuerola     | 114      | Site Investigator                              | Valter Niemelä       | 121      | Site Investigator                              |
| Paloma Millan Palanca         | 115      | Site Investigator                              | Dag Nyholm           | 121      | Site Investigator                              |
| Elena Bellosta Diago          | 115      | Site Investigator                              | Leif Wiklund         | 121      | Site Investigator                              |
| Javier López del Val          | 115      | Site Investigator                              | Jean-Marc Burgunder  | 122,161  | Site Investigator, REGISTRY Steering Committee |
| Laura Martinez Martinez       | 115      | Site Investigator                              | Jessica Koehli       | 122      | Site Investigator                              |
| Elena López                   | 115      | Site Investigator                              | Yanik Stebler        | 122      | Site Investigator                              |
| Jan Wahlström+                | 116      | Site Investigator, REGISTRY Steering Committee | Alain Kaelin         | 123      | Site Investigator                              |
| Ulrika Høsterey-Ugander       | 116      | Site Investigator                              | Irene Romero         | 123      | Site Investigator                              |
| Gunnel Fredlund               | 116      | Site Investigator                              | Michael Schüpbach    | 123      | Site Investigator                              |
| Radu Constantinescu           | 116      | Site Investigator                              | Sabine Weber Zaugg   | 123      | Site Investigator                              |
| Kajsa Lewin                   | 116      | Site Investigator                              | Federica Esposito    | 124      | Site Investigator                              |
| Liselotte Neleborn-Lingefjärd | 116      | Site Investigator                              | Jean-Marc Good       | 124      | Site Investigator                              |
| Maria Berglund                | 116      | Site Investigator                              | Karin Paus           | 124      | Site Investigator                              |
| Peter Berglund                | 116      | Site Investigator                              | Francois Vingerhoets | 124      | Site Investigator                              |
| Petra Linnsand                | 116      | Site Investigator                              | Christian Wider+     | 124      | Site Investigator                              |
| Åsa Petersén                  | 117      | Site Investigator                              | Hans H. Jung         | 125      | Site Investigator                              |
| Jan Reimer                    | 117      | Site Investigator                              | Jens A. Petersen     | 125      | Site Investigator                              |
| Håkan Widner                  | 117      | Site Investigator                              | Maria Ligon-Auer     | 125      | Site Investigator                              |
| Mouna Esmailzadeh             | 118      | Site Investigator                              | Violeta Mihaylova    | 125      | Site Investigator                              |
| Joakim Tedroff                | 118      | Site Investigator                              | Lorna Downie         | 126      | Site Investigator                              |
| Elisabeth Winnberg            | 118      | Site Investigator                              | Roisin Jack          | 126      | Site Investigator                              |
| Stanislav Benaminov           | 119      | Site Investigator                              | Kirsty Matheson      | 126      | Site Investigator                              |
| Elisabeth Björnsson           | 119      | Site Investigator                              | Zosia Miedzybrodzka  | 126      | Site Investigator                              |
| Daniel Merrick                | 119      | Site Investigator                              | Daniela Rae          | 126      | Site Investigator                              |
| Martin Paucar                 | 119      | Site Investigator                              | Sheila A Simpson     | 126      | Site Investigator                              |
| Sven Pålhagen                 | 119      | Site Investigator, REGISTRY Steering Committee | Fiona Summers        | 126      | Site Investigator                              |
| Per Svenningsson              | 119      | Site Investigator                              | Alexandra Ure        | 126      | Site Investigator                              |

| Name                            | Location | Contribution/Role                                    | Name                                                 | Location | Contribution/Role                             |
|---------------------------------|----------|------------------------------------------------------|------------------------------------------------------|----------|-----------------------------------------------|
| Vivien Vaughan                  | 126      | Site Investigator                                    | Sarah Hunt                                           | 132      | Site Investigator                             |
| Timothy Harrower                | 127,135  | Site Investigator                                    | Lesley Jones                                         | 132      | Site Investigator                             |
| Nathan Vernon                   | 127      | Site Investigator                                    | Una Jones                                            | 132      | Site Investigator                             |
| Shahbana Akhtar                 | 128      | Site Investigator                                    | Hanan Khalil                                         | 132      | Site Investigator                             |
| Jenny Crooks                    | 128      | Site Investigator                                    | Sara Minster                                         | 132,163  | Site Investigator,<br>Language<br>Coordinator |
| Adrienne Curtis                 | 128      | Site Investigator                                    | Michael Owen                                         | 132      | Site Investigator                             |
| Jenny de Souza<br>(Keylock)     | 128      | Site Investigator                                    | Kathleen Price                                       | 132      | Site Investigator                             |
| John Piedad                     | 128      | Site Investigator                                    | Jenny Townhill                                       | 132,163  | Site Investigator,<br>Language<br>Coordinator |
| Hugh Rickards                   | 128      | Site Investigator                                    | Anne Rosser                                          | 132      | Site Investigator                             |
| Jan Wright                      | 128      | Site Investigator                                    | David Goudie                                         | 133      | Site Investigator                             |
| Diane Haig-Brown                | 129,154  | Site Investigator                                    | Lindsay Buchanan                                     | 133      | Site Investigator                             |
| Janet Craven                    | 129,154  | Site Investigator                                    | Paula McFadyen                                       | 133      | Site Investigator                             |
| Andrew Pallett                  | 129      | Site Investigator                                    | Alison Tonner                                        | 133      | Site Investigator                             |
| Steve Simpson                   | 129,154  | Site Investigator                                    | Anne-Marie Taylor                                    | 133      | Site Investigator                             |
| Rebecca Weekes                  | 129,154  | Site Investigator                                    | Maureen Edwards                                      | 134      | Site Investigator                             |
| Elizabeth Coulthard             | 130      | Site Investigator                                    | Carrie Ho (Scottish<br>Huntington 's<br>Association) | 134      | Site Investigator                             |
| Louise Gethin                   | 130      | Site Investigator                                    | Marie McGill                                         | 134      | Site Investigator                             |
| Beverley Hayward                | 130      | Site Investigator                                    | Mary Porteous                                        | 134      | Site Investigator                             |
| Kasia Sieradzan                 | 130      | Site Investigator                                    | Pauline Pearson                                      | 134      | Site Investigator                             |
| Abigail Wright                  | 130,163  | Site Investigator,<br>Language<br>Coordinator        | Sarah Irvine                                         | 135      | Site Investigator                             |
| Roger A. Barker                 | 131      | Site Investigator                                    | Peter Brockie                                        | 136      | Site Investigator                             |
| Deidre O'Keefe                  | 131      | Site Investigator                                    | Jillian Foster                                       | 136      | Site Investigator                             |
| Anna Gerrtiz (nee Di<br>Pietro) | 131      | Site Investigator                                    | Nicola Johns                                         | 136      | Site Investigator                             |
| Kate Fisher                     | 131      | Site Investigator                                    | Sue McKenzie                                         | 136      | Site Investigator                             |
| Anna Goodman                    | 131      | Site Investigator                                    | Jean Rothery                                         | 136      | Site Investigator                             |
| Susan Hill                      | 131      | Site Investigator                                    | Gareth Thomas                                        | 136      | Site Investigator                             |
| Sarah Mason                     | 131      | Site Investigator                                    | Shona Yates                                          | 136      | Site Investigator                             |
| Rachel Swain                    | 131      | Site Investigator                                    | Christian Neumann                                    | 137      | Site Investigator                             |
| Natalie Valle Guzman            | 131      | Site Investigator                                    | Kirsten Patterson                                    | 137      | Site Investigator                             |
| Jonathan Bisson                 | 132      | Site Investigator                                    | David Thomson                                        | 137      | Site Investigator                             |
| Monica Busse                    | 132      | Site Investigator                                    | Catherine Deith                                      | 138      | Site Investigator                             |
| Cynthia Butcher                 | 132      | Site Investigator                                    | Jane Ireland                                         | 138      | Site Investigator                             |
| Jenny Callaghan                 | 132,149  | Site Investigator,<br>Language<br>Coordinator        | Stuart Ritchie                                       | 138      | Site Investigator                             |
| Rebecca Cousins                 | 132      | Site Investigator                                    | Pauline Brown                                        | 139      | Site Investigator                             |
| Stephen Dunnett                 | 132      | Site Investigator,<br>REGISTRY Steering<br>Committee | Liz Burrows                                          | 139      | Site Investigator                             |
| Catherine Clenaghan             | 132      | Site Investigator                                    | Amy Fletcher                                         | 139      | Site Investigator                             |
| Ruth Fullam                     | 132,149  | Site Investigator,<br>Language<br>Coordinator        | Alison Harding                                       | 139      | Site Investigator                             |

| Name               | Location | Contribution/Role | Name                         | Location | Contribution/Role                                    |
|--------------------|----------|-------------------|------------------------------|----------|------------------------------------------------------|
| Kaye Harrison      | 139      | Site Investigator | Charlotte Eddy               | 145      | Site Investigator                                    |
| Fiona Laver        | 139      | Site Investigator | Nayana Lahiri                | 145,147  | Site Investigator                                    |
| Mark Silva         | 139      | Site Investigator | Meriel McEntagart            | 145      | Site Investigator                                    |
| Aileen Thomson     | 139      | Site Investigator | Michael Patton               | 145      | Site Investigator                                    |
| Carol Chu          | 140      | Site Investigator | Maria Peterson               | 145      | Site Investigator                                    |
| Carole Evans       | 140      | Site Investigator | Sarah Rose                   | 145      | Site Investigator                                    |
| Deena Gallentree   | 140      | Site Investigator | Thomasin Andrews             | 146,147  | Site Investigator                                    |
| Stephanie Hamer    | 140,142  | Site Investigator | Andrew Dougherty             | 146      | Site Investigator                                    |
| Alison Kraus       | 140,142  | Site Investigator | Charlotte Golding            | 146,147  | Site Investigator                                    |
| Ivana Markova      | 140,142  | Site Investigator | Fred Kavalier                | 146      | Site Investigator                                    |
| Ashok Raman        | 140,142  | Site Investigator | Hana Laing                   | 146      | Site Investigator                                    |
| Liz Rowett         | 140,142  | Site Investigator | Alison Lashwood              | 146      | Site Investigator                                    |
| Alyson Andrew      | 141      | Site Investigator | Dene Robertson               | 146      | Site Investigator                                    |
| Julie Frost        | 141      | Site Investigator | Deborah Ruddy                | 146      | Site Investigator                                    |
| Rupert Noad        | 141      | Site Investigator | Alastair Santhouse           | 146      | Site Investigator                                    |
| Jeremy Cosgrove    | 142      | Site Investigator | Anna Whaite                  | 146      | Site Investigator                                    |
| Deena Gallantree   | 142      | Site Investigator | Stefanie Gosling (nee Brown) | 147      | Site Investigator                                    |
| Emma Hobson        | 142      | Site Investigator | Stefania Bruno               | 147      | Site Investigator                                    |
| Stuart Jamieson    | 142      | Site Investigator | Elvina Chu                   | 147,151  | Site Investigator                                    |
| Mandy Longthorpe   | 142      | Site Investigator | Karen Doherty                | 147      | Site Investigator                                    |
| Hannah Musgrave    | 142      | Site Investigator | Salman Haider                | 147      | Site Investigator                                    |
| Caroline Peacy     | 142      | Site Investigator | Davina Hensman               | 147      | Site Investigator                                    |
| Jean Toscano       | 142      | Site Investigator | Monica Lewis                 | 147      | Site Investigator                                    |
| Sue Wild           | 142      | Site Investigator | Marianne Novak               | 147      | Site Investigator                                    |
| Pam Yardumian      | 142      | Site Investigator | Aakta Patel                  | 147      | Site Investigator                                    |
| Carole Clayton     | 143      | Site Investigator | Nicola Robertson             | 147      | Site Investigator                                    |
| Heather Dipple     | 143      | Site Investigator | Elisabeth Rosser             | 147      | Site Investigator                                    |
| Dawn Freire-Patino | 143      | Site Investigator | Sarah Tabrizi                | 147      | Site Investigator,<br>REGISTRY Steering<br>Committee |
| Caroline Hallam    | 143      | Site Investigator | Rachel Taylor                | 147      | Site Investigator                                    |
| Julia Middleton    | 143      | Site Investigator | Thomas Warner                | 147      | Site Investigator                                    |
| Sundus Alusi       | 144      | Site Investigator | Edward Wild                  | 147      | Site Investigator                                    |
| Rhys Davies        | 144      | Site Investigator | Oda Ackermann                | 148      | Site Investigator                                    |
| Kevin Foy          | 144      | Site Investigator | Sophie Duport                | 148      | Site Investigator                                    |
| Emily Gerrans      | 144      | Site Investigator | Adrienne Scott               | 148      | Site Investigator                                    |
| Louise Pate        | 144      | Site Investigator | Nicholas Stoy                | 148      | Site Investigator                                    |
| Uruj Anjum         | 145      | Site Investigator | Jenny Vaughn                 | 148      | Site Investigator                                    |
| Jan Coebergh       | 145      | Site Investigator | Natalie Arran                | 149      | Site Investigator                                    |

| Name                                   | Location | Contribution/Role                          | Name                         | Location | Contribution/Role                                 |
|----------------------------------------|----------|--------------------------------------------|------------------------------|----------|---------------------------------------------------|
| Judith Bek                             | 149      | Site Investigator                          | Kathryn Dixon                | 152,156  | Site Investigator                                 |
| David Craufurd                         | 149      | Site Investigator                          | Richard Armstrong            | 152,156  | Site Investigator                                 |
| Marianne Hare                          | 149,155  | Site Investigator                          | David Harrison               | 153      | Site Investigator                                 |
| Liz Howard                             | 149      | Site Investigator                          | Max Hughes                   | 153      | Site Investigator                                 |
| Susan Huson                            | 149      | Site Investigator                          | Sandra Large                 | 153      | Site Investigator                                 |
| Liz Johnson                            | 149      | Site Investigator                          | John O Donovan               | 153      | Site Investigator                                 |
| Mary Jones                             | 149      | Site Investigator                          | Amy Palmer                   | 153      | Site Investigator                                 |
| Ashok Krishnamoorthy                   | 149      | Site Investigator                          | Andrew Parkinson             | 153      | Site Investigator                                 |
| Helen Murphy                           | 149      | Site Investigator                          | Beverley Soltysiak           | 153      | Site Investigator                                 |
| Emma Oughton                           | 149      | Site Investigator                          | Leanne Timings               | 153      | Site Investigator                                 |
| Lucy Partington-Jones                  | 149      | Site Investigator                          | Josh Williams                | 153      | Site Investigator                                 |
| Dawn Rogers                            | 149,163  | Site Investigator,<br>Language Coordinator | John Burn                    | 154      | Site Investigator                                 |
| Andrea Sollom                          | 149      | Site Investigator                          | Wendy Bailey                 | 154      | Site Investigator                                 |
| Julie Snowden                          | 149      | Site Investigator                          | Caroline Coleman             | 154      | Site Investigator                                 |
| Cheryl Stopford                        | 149      | Site Investigator                          | Tahir Majeed                 | 155      | Site Investigator                                 |
| Jennifer Thompson                      | 149      | Site Investigator                          | Nicola Verstraelen (Ritchie) | 155      | Site Investigator                                 |
| Iris Trender-Gerhard                   | 149      | Site Investigator                          | Wendy Barrett                | 156      | Site Investigator                                 |
| Nichola Verstraelen (formerly Ritchie) | 149      | Site Investigator                          | Aileen Ho                    | 156      | Site Investigator                                 |
| Leann Westmoreland                     | 149      | Site Investigator                          | Oliver Bandmann              | 157      | Site Investigator                                 |
| Ginette Cass                           | 150      | Site Investigator                          | Alyson Bradbury              | 157      | Site Investigator                                 |
| Lynn Davidson                          | 150      | Site Investigator                          | Helen Fairtlough             | 157      | Site Investigator                                 |
| Jill Davison                           | 150      | Site Investigator                          | Kay Fillingham               | 157      | Site Investigator                                 |
| Neil Fullerton                         | 150      | Site Investigator                          | Isabella Foustanos           | 157      | Site Investigator                                 |
| Katrina Holmes                         | 150      | Site Investigator                          | Paul Gill                    | 157      | Site Investigator                                 |
| Suresh Komati                          | 150      | Site Investigator                          | Mbombe Kazoka                | 157      | Site Investigator                                 |
| Sharon McDonnell                       | 150      | Site Investigator                          | Kirsty O'Donovan             | 157      | Site Investigator                                 |
| Zeid Mohammed                          | 150      | Site Investigator                          | Louise Nevitt                | 157      | Site Investigator                                 |
| Karen Morgan                           | 150      | Site Investigator                          | Nadia Peppia                 | 157,163  | Site Investigator,<br>Language Coordinator        |
| Lois Savage                            | 150      | Site Investigator                          | Oliver Quarrell              | 157      | Site Investigator,<br>REGISTRY Steering Committee |
| Baldev Singh                           | 150      | Site Investigator                          | Cat Taylor                   | 157      | Site Investigator                                 |
| Josh Wood                              | 150      | Site Investigator                          | Katherine Tidswell           | 157      | Site Investigator                                 |
| Caroline Knight                        | 151      | Site Investigator                          | Christopher Kipps            | 158      | Site Investigator                                 |
| Mari O'Neill                           | 151      | Site Investigator                          | Lesley MacKinnon             | 158      | Site Investigator                                 |
| Debasish Das Purkayastha               | 151      | Site Investigator                          | Veena Agarwal                | 158      | Site Investigator                                 |
| Andrea H Nemeth                        | 152      | Site Investigator                          | Elaine Hayward               | 158      | Site Investigator                                 |
| Gill Siuda                             | 152      | Site Investigator                          | Kerry Gunner                 | 158      | Site Investigator                                 |
| Ruth Valentine                         | 152      | Site Investigator                          | Kayla Harris                 | 158      | Site Investigator                                 |

| Name                      | Location | Contribution/Role                              | Name                           | Location | Contribution/Role                                                    |
|---------------------------|----------|------------------------------------------------|--------------------------------|----------|----------------------------------------------------------------------|
| Mary Anderson             | 158      | Site Investigator                              | Tim McLean                     | 163      | Site Investigator, REGISTRY Steering Committee                       |
| Melanie Heywood           | 158      | Site Investigator                              | Susana Pro Koivisto            | 163,167  | Site Investigator, REGISTRY Steering Committee, Language Coordinator |
| Liane Keys                | 158      | Site Investigator                              | Markku Päivärinta              | 168      | Site Investigator, REGISTRY Steering Committee                       |
| Sarah Smalley             | 158      | Site Investigator                              | Tereza Uhrova                  | 169      | Site Investigator, REGISTRY Steering Committee                       |
| George El-Nimr            | 159      | Site Investigator                              | Verena Baake (formerly Rödigg) | 163      | Site Investigator, Language Coordinator                              |
| Allison Duffell           | 159      | Site Investigator                              | Katrin Barth                   | 163      | Site Investigator, Language Coordinator                              |
| Sue Wood                  | 159      | Site Investigator                              | Monica Bascuñana Garde         | 163      | Site Investigator, Language Coordinator                              |
| Karen Kennedy (nee Smith) | 159      | Site Investigator                              | Kristina Becanovic             | 163      | Site Investigator, Language Coordinator                              |
| Lesley Gowers             | 160      | Site Investigator                              | Tomáš Bernard                  | 163      | Site Investigator, Language Coordinator                              |
| Kingsley Powell           | 160      | Site Investigator                              | Sabrina Betz                   | 163      | Site Investigator, Language Coordinator                              |
| Pamela Bethwaite          | 160      | Site Investigator                              | Adrien Come                    | 163      | Site Investigator, Language Coordinator                              |
| Rachel Edwards            | 160      | Site Investigator                              | Selene Capodarca               | 163      | Site Investigator, Language Coordinator                              |
| Kathleen Fuller           | 160      | Site Investigator                              | Sébastien Charpentier          | 163      | Site Investigator, Language Coordinator                              |
| Michelle Phillips         | 160      | Site Investigator                              | Wildson Vieira da Silva        | 163      | Site Investigator, Language Coordinator                              |
| Louis Tan                 | 161      | Site Investigator                              | Martina Di Renzo               | 163      | Site Investigator, Language Coordinator                              |
| Puay Ngoh Lau             | 161      | Site Investigator                              | Ana Maria Finisterra           | 163      | Site Investigator, Language Coordinator                              |
| Emmanuel Pica             | 161      | Site Investigator                              | Camille Genoves                | 163      | Site Investigator, Language Coordinator                              |
| Ida Biunno                | 162      | Site Investigator, REGISTRY Steering Committee | Mette Gilling                  | 163      | Site Investigator, Language Coordinator                              |
| Juliana Bronzova          | 163      | Site Investigator, REGISTRY Steering Committee | Olivia J Handley               | 163      | Site Investigator, Language Coordinator                              |
| Joe Giuliano              | 164      | Site Investigator, REGISTRY Steering Committee | Carina Hvalstedt               | 163      | Site Investigator, Language Coordinator                              |
| Olivia J. Handley         | 163      | Site Investigator, REGISTRY Steering Committee | Hasina Hussain                 | 163      | Site Investigator, Language Coordinator                              |
| Torsten Illmann           | 165      | Site Investigator, REGISTRY Steering Committee | Kerstin Koppers                | 163      | Site Investigator, Language Coordinator                              |
| Jamie Levey               | 163      | Site Investigator, REGISTRY Steering Committee | Claudia Lamanna                | 163      | Site Investigator, Language Coordinator                              |

| Name                               | Location | Contribution/Role                          |
|------------------------------------|----------|--------------------------------------------|
| Matilde Laurà                      | 163      | Site Investigator,<br>Language Coordinator |
| Kristina Münkkel                   | 163      | Site Investigator,<br>Language Coordinator |
| Lisanne Mütze                      | 163      | Site Investigator,<br>Language Coordinator |
| Martin Oehmen                      | 163      | Site Investigator,<br>Language Coordinator |
| Helene Padieu                      | 163      | Site Investigator,<br>Language Coordinator |
| Laurent Paterski                   | 163      | Site Investigator,<br>Language Coordinator |
| Beate Rindal                       | 163      | Site Investigator,<br>Language Coordinator |
| Niini Røren (formerly<br>Heinonen) | 163      | Site Investigator,<br>Language Coordinator |
| Ana Salgueiro                      | 163      | Site Investigator,<br>Language Coordinator |
| Pavla Šašinková                    | 163      | Site Investigator,<br>Language Coordinator |
| Catherine Taylor                   | 163      | Site Investigator,<br>Language Coordinator |
| Erika Timewell                     | 163      | Site Investigator,<br>Language Coordinator |
| Marleen R van<br>Walsem            | 163      | Site Investigator,<br>Language Coordinator |
| Marie-Noelle Witjes-<br>Ané        | 163      | Site Investigator,<br>Language Coordinator |
| Daniel Zielonka                    | 163      | Site Investigator,<br>Language Coordinator |
| Eugeniusz Zielonka                 | 163      | Site Investigator,<br>Language Coordinator |

1 **Affiliations:**

- 2 1: Graz (Medizinische Universitäts Graz, Psychiatrie), Austria  
3 2: Innsbruck (Universitätsklinik Innsbruck, Neurologie), Austria  
4 3: Salzburg (Christian-Doppler-Klinik Salzburg, Universitätsklinikum der PMU, Universitätsklinik für  
5 Neurologie), Austria  
6 4: Vienna-UNI , Austria  
7 5: Bierbeek, Belgium  
8 6: Bruxelles (Vrije Universiteit Brussel), Belgium  
9 7: Bruxelles (Erasmus) , Belgium  
10 8: Bruxelles (St-Luc), Belgium  
11 9: Charleroi (Institut de Pathologie et de Génétique (IPG)), Belgium  
12 10: Leuven (Universitair Ziekenhuis Gasthuisberg), Belgium  
13 11: Olomouc (Neurologická klinika, Fakultní nemocnice Olomouc), Czech Republic  
14 12: Prague (Extrapiramidové centrum, Neurologická klinika, 1. LF UK a VFN), Czech Republic  
15 13: Aarhus (Aarhus University Hospital), Denmark  
16 14: Copenhagen University Hospital (Rigshospitalet, Memory clinic), Denmark  
17 15: Odense (Odense University Hospital), Denmark  
18 16: Åland, Finland  
19 17: Helsinki - Vaestoliitto (Department of Medical Genetics), Finland  
20 18: Kuopio: Anu Bruun, Finland  
21 19: Oulu (Dep. of Neurology), Finland



- 1 20: Oulu (Dep. of Medical Genetics), Finland
- 2 21: Tampere (Terveystalo Healthcare Service Centre), Finland
- 3 22: Turku-Suvituuli (Rehabilitation Centre Suvituuli), Finland
- 4 23: Angers (Centre de référence des maladies neurogénétique- CHU d'Angers), France
- 5 24: Bordeaux (Hôpital Pellegrin), France
- 6 25: Clermont-Ferrand (Hôpital Gabriel Montpied), France
- 7 26: Creteil (Hôpital Henri Mondor), France
- 8 27: Lille-Amiens (Lille (CHRU Roger Salengro)) , France
- 9 28: Lille-Amiens (Amiens (CHU Sud)) , France
- 10 29: Marseille (Hôpital La Timone), France
- 11 30: Paris (Hôpital de la Pitié Salpêtrière), France
- 12 31: Rouen (Hôpital Charles Nicolle), France
- 13 32: Strasbourg (Hôpital Civil), France
- 14 33: Toulouse (Hôpital Purpan), France
- 15 34: Aachen (Universitätsklinikum Aachen, Neurologische Klinik), Germany
- 16 35: Berlin (Universitätsmedizin Berlin, Klinik und Poliklinik für Neurologie), Germany
- 17 36: Bochum (Huntington-Zentrum (NRW) Bochum im St. Josef-Hospital), Germany
- 18 37: Bremen, Germany
- 19 38: Dinslaken (Reha Zentrum in Dinslaken im Gesundheitszentrums Lang), Germany
- 20 39: Dresden (Universitätsklinikum Carl Gustav Carus an der Technischen Universität Dresden, Klinik  
21 und Poliklinik für Neurologie), Germany
- 22 40: Erlangen (Universitätsklinikum Erlangen, Molekulare Neurologie und Klinik für Neurologie),  
23 Germany
- 24 41: Freiburg (Universitätsklinik Freiburg, Neurologie), Germany
- 25 42: Hamburg (Universitätsklinikum Hamburg-Eppendorf, Klinik und Poliklinik für Neurologie),  
26 Germany
- 27 43: Hannover (Neurologische Klinik mit Klinischer Neurophysiologie, Medizinische Hochschule  
28 Hannover), Germany
- 29 44: Itzehoe (Schwerpunktpraxis Huntington Neurologie und Psychiatrie), Germany
- 30 45: Marburg KPP (Klinik für Psychiatrie und Psychotherapie Marburg-Süd), Germany
- 31 46: Marburg UNI (Universitätsklinik Marburg, Sprechstunde für choreatiforme Bewegungsstörungen),  
32 Germany
- 33 47: München (Huntington-Ambulanz im Neuro-Kopfzentrum - Klinikum rechts der Isar der  
34 Neurologischen Klinik und Poliklinik der Technischen Universität München), Germany
- 35 48: Münster (Universitätsklinikum Münster, Klinik und Poliklinik für Neurologie), Germany
- 36 49: Taufkirchen (Isar-Amper-Klinikum - Klinik Taufkirchen (Vils)), Germany
- 37 50: Ulm (Universitätsklinikum Ulm, Neurologie), Germany
- 38 51: Würzburg (Universitätsklinikum Würzburg, Neurologie), Germany
- 39 52: Bari (Neurophysiopathology of Pain Unit, Basic Medical, Neuroscience and Sensory System  
40 Department, University of Bari), Italy

- 1 53: Bologna (DIBINEM - Alma Mater Studiorum - Università di Bologna, IRCCS Istituto delle Scienze
- 2 Neurologiche di Bologna), Italy
- 3 54: Brescia (Division of Biology and Genetics, Department of Molecular and Translational Medicine &
- 4 Division of Neurology, Department of Clinical and Experimental Sciences, University of Brescia), Italy
- 5 55: Cagliari (Movement Disorders Center, Department of Neurology, Institute of Neurology, University
- 6 of Cagliari), Italy
- 7 56: Florence (Department of NEUROFARBA, University of Florence & Careggi University Hospital,
- 8 IRCSS " Don Gnocchi "), Italy
- 9 57: Genoa (Department of Neuroscience, Rehabilitation, Ophthalmology, Genetics, Maternal and
- 10 Child Health, University of Genova), Italy
- 11 58: Milan (SODS Genetica delle Malattie Neurodegenerative e Metaboliche & U.O. Neurologia,
- 12 Fondazione IRCCS Istituto Neurologico Carlo Besta), Italy
- 13 59: Naples (Department of Neurosciences and Reproductive and Odontostomatological Sciences
- 14 Federico II University of Naples), Italy
- 15 60: Pozzilli (IS) (IRCCS Neuromed), Italy
- 16 61: IRCCS Casa Sollievo della Sofferenza, San Giovanni Rotondo, Italy
- 17 62: Rome (LIRH Foundation), Italy
- 18 63: Rome (Department of Neurology, Università Cattolica del Sacro Cuore; Institute of Translational
- 19 Pharmacology & Institute of Cognitive Sciences and Technologies, National Research Council of
- 20 Italy), Italy
- 21 64: Rome (Azienda Ospedaliera Sant'Andrea; Department of Neuroscience, Mental Health and
- 22 Sensory Organs (NESMOS), Faculty of Medicine and Psychology, Sapienza University of Rome;
- 23 Institute of Translational Pharmacology & Institute of Cognitive Sciences and Technologies, National
- 24 Research Council of Italy), Italy
- 25 65: Enschede (Medisch Spectrum Twente), Netherlands
- 26 66: Groningen (Polikliniek Neurologie), Netherlands
- 27 67: Leiden (Leiden University Medical Centre (LUMC)), Netherlands
- 28 68: Maastricht, Netherlands
- 29 69: Nijmegen (Universitair Medisch Centrum St. Radboud, Neurology), Netherlands
- 30 70: Bergen (Haukeland University Hospital, Dept of Medical Genetics and Olaviken Psychiatric
- 31 Hospital), Norway
- 32 71: Bergen (NKS Olaviken`s HD clinic), Norway
- 33 72: Oslo University Hospital (Dept. of Medical Genetics, Dept. of Neurology, Dept.of
- 34 Neurorehabilitation), Norway
- 35 73: Trondheim (St. Olavs Hospital), Norway
- 36 74: Gdansk (St. Adalbert Hospital, Gdansk, Medical University of Gdansk, Neurological and
- 37 Psychiatric Nursing Dpt.), Poland
- 38 75: Katowice (Medical University of Silesia, Katowice), Poland
- 39 76: Krakow (Krakowska Akademia Neurologii), Poland
- 40 77: Poznan (Poznan University of Medical Sciences), Poland

- 1 78: Warsaw-MU (Medical University of Warsaw, Neurology), Poland
- 2 79: Warsaw-IPiN (Institute of Psychiatry and Neurology Dep. of Genetics, First Dep. of Neurology),
- 3 Poland
- 4 80: Coimbra – (Hospital Universitário de Coimbra), Portugal
- 5 81: Lisbon-Central (Hospital dos Capuchos, Centro Hospitalar Lisboa Central), Portugal
- 6 82: Lisbon-HSM (Hospital de Santa Maria, Clinical Pharmacology Unit, Instituto de Medicina
- 7 Molecular), Portugal
- 8 83: Lisbon-HFF (Hospital Fernando da Fonseca), Portugal
- 9 84: Porto-HGSA (Hospital Santo António- Centro Hospitalar do Porto), Portugal
- 10 85: Porto- HSJ (Hospital de São João), Portugal
- 11 86: Kazan, Russian Federation
- 12 87: Moscow – (Research Center of Neurology) , Russian Federation
- 13 88: Nizhny Novgorod – (Nizhny Novgorod Medical Academy, Neurology Department), Russian
- 14 Federation
- 15 89: Ufa – (Bashkir State Medical University, Department of Neurology, Neurosurgery, and Medical
- 16 Genetics), Russian Federation
- 17 90: Voronezh, Russian Federation
- 18 91: Alicante-Alcoy (Hospital Virgen de los Lirios), Spain
- 19 92: Badajoz (Hospital Infanta Cristina), Spain
- 20 93: Barcelona-Bellvitge (Hospital Universitari de Bellvitge), Spain
- 21 94: Barcelona- Clínic i Provincial (Hospital Clínic i Provincial), Spain
- 22 95: Barcelona-Hospital Mútua de Terrassa, Spain
- 23 96: Barcelona-Merced (Hospital Mare de Deu de La Merced), Spain
- 24 97: Barcelona-Santa Cruz y San Pablo (Hospital de la Santa Creu i Sant Pau), Spain
- 25 98: Bilbao (Hospital de Cruces), Spain
- 26 99: Burgos (Servicio de Neurología Hospital General Yagüe), Spain
- 27 100: Canarias (Hospital Insular de Gran Canaria), Spain
- 28 101: Fuenlabrada (Hospital Universitario), Spain
- 29 102: Granada (Hospital Universitario San Cecilio, Neurología), Spain
- 30 103: Madrid-BTCIEN (Fundación CIEN), Spain
- 31 104: Madrid-Clínico (Hospital Clínico Universitario San Carlos), Spain
- 32 105: Madrid RYC (Hospital Ramón y Cajal, Neurología), Spain
- 33 106: Madrid FJD (Madrid-Fundación Jiménez Díaz), Spain
- 34 107: Murcia (Hospital Universitario Virgen de la Arrixaca), Spain
- 35 108: Oviedo (Hospital Central de Asturias), Spain
- 36 109: Palma de Mallorca (Hospital Universitario Son Espases), Spain
- 37 110: Pamplona (Complejo Hospitalario de Navarra), Spain
- 38 111: Sevilla (Hospital Universitario Virgen del Rocío), Spain
- 39 112: Sevilla (Hospital Virgen Macarena), Spain
- 40 113: Sevilla (Residencia Santa Ana), Spain

- 1 114: Valencia (Hospital la Fe), Spain
- 2 115: Zaragoza (Hospital Clínico), Spain
- 3 116: Göteborg (Sahlgrenska University Hospital), Sweden
- 4 117: Lund (Dept Neurology, Skånes Universityhospital), Sweden
- 5 118: Stockholm-Ersta, Sweden
- 6 119: Stockholm Karolinska University Hospital, Sweden
- 7 120: Umeå (Umeå University Hospital), Sweden
- 8 121: Uppsala University Hospital, Sweden
- 9 122: Bern (Swiss HD Zentrum), Switzerland
- 10 123: Bern (Zentrum für Bewegungsstörungen, Neurologische Klinik und Poliklinik, Universität Bern),  
11 Switzerland
- 12 124: Lausanne, Switzerland
- 13 125: Zürich (University Hospital and University of Zurich), Switzerland
- 14 126: Aberdeen (NHS Grampian Clinical Genetics Centre & University of Aberdeen), UK
- 15 127: Barnstaple, UK
- 16 128: Birmingham (The Barberry Centre, Dept of Psychiatry), UK
- 17 129: Blanford Forum, UK
- 18 130: Bristol (North Bristol NHs Trust, Southmead hospital), UK
- 19 131: Cambridge (Cambridge Centre for Brain Repair, Forvie Site), UK
- 20 132: Cardiff (Schools of Medicine and Biosciences, Cardiff University), UK
- 21 133: Dundee (Scottish Huntington's Association, Ninewells Hospital), UK
- 22 134: Edinburgh (SE Scotland Genetic Service, Western General Hospital), UK
- 23 135: Exeter (Department of Neurology Royal Devon and Exeter Foundation Trust Hospital), UK
- 24 136: Fife (Scottish Huntington's Association Whyteman's Brae Hospital), UK
- 25 137: Forth Valley (Neurology Department, Forth Valley Royal Hospital), UK
- 26 138: Glasgow (Glasgow HD Management Clinic, Southern General Hospital), UK
- 27 139: Gloucester (Department of Neurology Gloucestershire Royal Hospital), UK
- 28 140: Hull (Castle Hill Hospital), UK
- 29 141: Launceston (Millaton Court), UK
- 30 142: Leeds (Chapel Allerton Hospital, Department of Clinical Genetics), UK
- 31 143: Leicester (Leicestershire Partnership Trust, Mill Lodge), UK
- 32 144: Liverpool (Walton Centre for Neurology and Neurosurgery), UK
- 33 145: London (St. Georges-Hospital), UK
- 34 146: London (Guy's Hospital), UK
- 35 147: London (The National Hospital for Neurology and Neurosurgery), UK
- 36 148: London (Royal Hospital for Neuro-disability), UK
- 37 149: Manchester (Genetic Medicine, University of Manchester, Manchester Academic Health  
38 Sciences Centre and Central Manchester University Hospitals NHS Foundation Trust), UK
- 39 150: Newcastle-upon-Tyne (Centre for Life, Institute of Medical Genetics), UK
- 40 151: Northampton (St Andrew's Healthcare), UK

- 1 152: Oxford (Oxford University Hospitals NHS Trust, Dept. of Neurosciences, University of Oxford),
- 2 UK
- 3 153: Plymouth (Plymouth Huntington Disease Service, Mount Gould Hospital), UK
- 4 154: Poole (Brain Injury Service, Poole Hospital), UK
- 5 155: Preston (Neurology Department, Preston Royal Hospital), UK
- 6 156: Reading (Royal Berkshire Hospital), UK
- 7 157: Sheffield (The Royal Hallamshire Hospital– Sheffield Children’s Hospital), UK
- 8 158: Southampton (Southampton General Hospital), UK
- 9 159: Stoke on Trent (Bucknall Hospital), UK
- 10 160: Swindon (Victoria Centre, Great Western Hospital), UK
- 11 161: EHDN’s associate site in Singapore: National Neuroscience Institute Singapore,
- 12 162: Institute for Genetic and Biomedical Research, University of Milan, Italy
- 13 163: European Huntington’s Disease Network (EHDN), Ulm, Germany,
- 14 164: CHDI Foundation, Inc., New York, USA
- 15 165: 2mt Software GmbH, Ulm, Germany
- 16 166: Clinic of Neurology, Charles University and General Teaching Hospital, Prague, Czech Republic,
- 17 Czech Republic
- 18 167: Center for Rare Disorders, Oslo University Hospital HF, Rikshospitalet, Norway
- 19 168: Department of Neurology, Turku University Hospital, Turku, Finland
- 20 169: Clinic of Psychiatry, Charles University and General Teaching Hospital, Prague, Czech Republic
- 21

1 **Appendix 3 – Huntington’s disease clinical characteristics**  
2 **questionnaire (HD-CCQ) questions**

3

| Symptom                                         | Question                                                                                                                                                                                                                                              |
|-------------------------------------------------|-------------------------------------------------------------------------------------------------------------------------------------------------------------------------------------------------------------------------------------------------------|
| Motor                                           | Have motor symptoms compatible with HD ever been a part of the subject’s medical history? At what age did the subject’s motor symptoms begin?                                                                                                         |
| Cognitive                                       | Has significant cognitive impairment (severe enough to impact on work or activities of daily living) or dementia ever been a part of the subject’s medical history? At what age did cognitive impairment first start to have an impact on daily life? |
| Apathy                                          | Has apathy ever been a part of the subject’s medical history? At what age did apathy begin?                                                                                                                                                           |
| Depression                                      | Has depression (includes treatment with antidepressants with or without a formally-stated diagnosis of depression) ever been a part of the subject’s medical history? At what age did the depression begin?                                           |
| Perseverative/<br>obsessive<br>behaviours (POB) | Has perseverative/obsessive behaviours ever been a part of the subject’s medical history? At what age did perseverative/obsessive behaviour begin?                                                                                                    |
| Irritability                                    | Has irritability ever been a part of the subject’s medical history? At what age did the irritability begin?                                                                                                                                           |
| Violent or<br>aggressive<br>behaviour (VAB)     | Has violent or aggressive behaviour ever been a part of the subject’s medical history? At what age did violent or aggressive behaviour begin?                                                                                                         |
| Psychosis                                       | Has psychosis (hallucinations or delusions) ever been a part of the subject’s medical history? At what age did psychosis (hallucinations or delusions) begin?                                                                                         |

4 Questionnaire taken from the European Huntington’s Disease Network’s (EHDN)

5 data dictionary for Registry (Version 3).

6

1 **References**

- 2 1 The Huntington's Disease Collaborative Research Group. A novel gene  
3 containing a trinucleotide repeat that is expanded and unstable on  
4 Huntington's disease chromosomes. The Huntington's Disease Collaborative  
5 Research Group. *Cell* 1993; **72**: 971–83.
- 6 2 Andrew SE, Paul Goldberg Y, Kremer B, *et al.* The relationship between  
7 trinucleotide (CAG) repeat length and clinical features of Huntington's disease.  
8 *Nat Genet* 1993; **4**: 398–403.
- 9 3 Duyao M, Ambrose C, Myers R, *et al.* Trinucleotide repeat length instability  
10 and age of onset in Huntington's disease. *Nat Genet* 1993; **4**: 387–92.
- 11 4 Bates GP, Dorsey R, Gusella JF, *et al.* Huntington disease. *Nat Rev Dis Prim*  
12 2015; **1**: 15005.
- 13 5 Craufurd D, Snowden J. Neuropsychiatry and Neuropsychology. In: Bates GP,  
14 Tabrizi SJ, Jones L, eds. Huntington's Disease, 4th edn. New York: Oxford  
15 University Press, 2014: 36–65.
- 16 6 Scahill RI, Zeun P, Osborne-Crowley K, *et al.* Biological and clinical  
17 characteristics of gene carriers far from predicted onset in the Huntington's  
18 disease Young Adult Study (HD-YAS): a cross-sectional analysis. *Lancet*  
19 *Neurol* 2020; **19**: 502–12.
- 20 7 Paulsen JS, Long JD, Johnson HJ, *et al.* Clinical and Biomarker Changes in  
21 Premanifest Huntington Disease Show Trial Feasibility: A Decade of the  
22 PREDICT-HD Study. *Front Aging Neurosci* 2014; **6**: 78.
- 23 8 Tabrizi SJ, Scahill RI, Owen G, *et al.* Predictors of phenotypic progression and

- 1 disease onset in premanifest and early-stage Huntington's disease in the  
2 TRACK-HD study: analysis of 36-month observational data. *Lancet Neurol*  
3 2013; **12**: 637–49.
- 4 9 Orth M, Handley OJ, Schwenke C, *et al.* Observing Huntington's Disease: the  
5 European Huntington's Disease Network's REGISTRY. *PLoS Curr* 2010; **2**:  
6 RRN1184.
- 7 10 Eddy CM, Parkinson EG, Rickards HE. Changes in mental state and behaviour  
8 in Huntington's disease. *The Lancet Psychiatry* 2016; **3**: 1079–86.
- 9 11 Unified Huntington's disease rating scale: Reliability and consistency. *Mov*  
10 *Disord* 1996; **11**: 136–42.
- 11 12 Fisher R. On the 'Probable Error' of a Coefficient of Correlation Deduced from  
12 a Small Sample. *Metron* 1921; **1**: 3–32.
- 13 13 GeM-HD Consortium. Identification of Genetic Factors that Modify Clinical  
14 Onset of Huntington's Disease. *Cell* 2015; **162**: 516–26.
- 15 14 Genetic Modifiers of Huntington's Disease (GeM-HD) Consortium. CAG  
16 Repeat Not Polyglutamine Length Determines Timing of Huntington's Disease  
17 Onset. *Cell* 2019; **178**: 887–900.
- 18 15 Landwehrmeyer GB, Fitzer-Attas CJ, Giuliano JD, *et al.* Data Analytics from  
19 Enroll-HD, a Global Clinical Research Platform for Huntington's Disease. *Mov*  
20 *Disord Clin Pract* 2017; **4**: 212–24.
- 21 16 Dorsey ER. Characterization of a large group of individuals with huntington  
22 disease and their relatives enrolled in the COHORT study. *PLoS One* 2012; **7**:  
23 e29522.



- 1 17 Lee J-M, Ramos EM, Lee J-H, *et al.* CAG repeat expansion in Huntington  
2 disease determines age at onset in a fully dominant fashion. *Neurology* 2012;  
3 **78**: 690–5.
- 4 18 Rinaldi C, Salvatore E, Giordano I, *et al.* Predictors of survival in a  
5 Huntington's disease population from southern Italy. *Can J Neurol Sci* 2012;  
6 **39**: 48–51.
- 7 19 Snell R, MacMillan J, Cheadle J, *et al.* Relationship between trinucleotide  
8 repeat expansion and phenotypic variation in Huntington's disease. *Nat Genet*  
9 1993; **4**: 393–7.
- 10 20 Illarioshkin SN, Igarashi S, Onodera O, *et al.* Trinucleotide repeat length and  
11 rate of progression of Huntington's disease. *Ann Neurol* 1994; **36**: 630–5.
- 12 21 Kiebertz K, MacDonald M, Shih C, *et al.* Trinucleotide repeat length and  
13 progression of illness in Huntington's disease. *J Med Genet* 1994; **31**: 872–4.
- 14 22 Langbehn DR, Brinkman RR, Falush D, Paulsen JS, Hayden MR. A new  
15 model for prediction of the age of onset and penetrance for Huntington's  
16 disease based on CAG length. *Clin Genet* 2004; **65**: 267–77.
- 17 23 Wexler NS, Lorimer J, Porter J, *et al.* Venezuelan kindreds reveal that genetic  
18 and environmental factors modulate Huntington's disease age of onset. *Proc*  
19 *Natl Acad Sci U S A* 2004; **101**: 3498–503.
- 20 24 Oosterloo M, Bijlsma EK, van Kuijk SM, *et al.* Clinical and genetic  
21 characteristics of late-onset Huntington's disease. *Park Relat Disord* 2019; **61**:  
22 101–5.
- 23 25 Fusilli C, Migliore S, Mazza T, *et al.* Biological and clinical manifestations of

- 1 juvenile Huntington's disease: a retrospective analysis. *Lancet Neurol* 2018;  
2 17: 986–93.
- 3 26 Cronin T, Rosser A, Massey T. Clinical Presentation and Features of Juvenile-  
4 Onset Huntington's Disease: A Systematic Review. *J Huntingtons Dis* 2019; 8:  
5 171–9.
- 6 27 Hensman Moss DJ, Pardiñas AF, Langbehn D, *et al.* Identification of genetic  
7 variants associated with Huntington's disease progression: a genome-wide  
8 association study. *Lancet Neurol* 2017; 16: 701–11.
- 9 28 Huntington's GM of, Disease Consortium (GeM-HD). Identification of Genetic  
10 Factors that Modify Clinical Onset of Huntington's Disease. *Cell* 2015; 162:  
11 516–26.
- 12 29 Cazeneuve C, Durr A. Genetic and Molecular Studies. In: Bates GP, Tabrizi  
13 SJ, Jones L, eds. *Huntington's Disease*, 4th Editio. New York: Oxford  
14 University Press (OUP), 2014: 109–30.
- 15 30 Zappacosta B, Monza D, Meoni C, *et al.* Psychiatric symptoms do not correlate  
16 with cognitive decline, motor symptoms, or CAG repeat length in Huntington's  
17 disease. *Arch Neurol* 1996; 53: 493–7.
- 18 31 Weigell-Weber M, Schmid W, Spiegel R. Psychiatric symptoms and CAG  
19 expansion in Huntington's disease. *Am J Med Genet* 1996; 67: 53–7.
- 20 32 Berrios GE, Wagle AC, Markova IS, *et al.* Psychiatric symptoms and CAG  
21 repeats in neurologically asymptomatic Huntington's disease gene carriers.  
22 *Psychiatry Res* 2001; 102: 217–25.
- 23 33 Vassos E, Panas M, Kladi A, Vassilopoulos D. Effect of CAG repeat length on

- 1 psychiatric disorders in Huntington's disease. *J Psychiatr Res* 2008; **42**: 544–  
2 9.
- 3 34 Wright GEB, Collins JA, Kay C, *et al.* Length of Uninterrupted CAG,  
4 Independent of Polyglutamine Size, Results in Increased Somatic Instability,  
5 Hastening Onset of Huntington Disease. *Am J Hum Genet* 2019; **104**: 1116–  
6 26.
- 7 35 Ciosi M, Maxwell A, Cumming SA, *et al.* A genetic association study of  
8 glutamine-encoding DNA sequence structures, somatic CAG expansion, and  
9 DNA repair gene variants, with Huntington disease clinical outcomes.  
10 *EBioMedicine* 2019; **48**: 568–80.
- 11 36 Martinez-Horta S, Perez-Perez J, van Duijn E, *et al.* Neuropsychiatric  
12 symptoms are very common in premanifest and early stage Huntington's  
13 Disease. *Parkinsonism Relat Disord* 2016; **25**: 58–64.
- 14 37 Oosterloo M, Craufurd D, Nijsten H, van Duijn E. Obsessive-Compulsive and  
15 Perseverative Behaviors in Huntington's Disease. *J Huntingtons Dis* 2019; **8**:  
16 1–7.
- 17 38 Andrews SC, Craufurd D, Durr A, *et al.* Executive impairment is associated  
18 with unawareness of neuropsychiatric symptoms in premanifest and early  
19 Huntington's disease. *Neuropsychology* 2018; **32**: 958–65.
- 20 39 Ellis N, Tee A, McAllister B, *et al.* Genetic Risk Underlying Psychiatric and  
21 Cognitive Symptoms in Huntington's Disease. *Biol Psychiatry* 2019; published  
22 online Dec 17. DOI:10.1016/j.biopsych.2019.12.010.
- 23 40 Escott-Price V, Bracher-Smith M, Menzies G, *et al.* Genetic liability to  
24 schizophrenia is negatively associated with educational attainment in UK

- 1 Biobank. *Mol Psychiatry* 2019; published online Jan. DOI:10.1038/s41380-  
2 018-0328-6.
- 3 41 Andrews SC, Langbehn DR, Craufurd D, *et al.* Apathy predicts rate of  
4 cognitive decline over 24 months in premanifest Huntington's disease. *Psychol*  
5 *Med* 2020; : 1–7.
- 6 42 Heinrichs RW, Zakzanis KK. Neurocognitive deficit in schizophrenia: a  
7 quantitative review of the evidence. *Neuropsychology* 1998; **12**: 426–45.
- 8 43 Kessler RC, Berglund P, Demler O, Jin R, Merikangas KR, Walters EE.  
9 Lifetime prevalence and age-of-onset distributions of DSM-IV disorders in the  
10 National Comorbidity Survey Replication. *Arch Gen Psychiatry* 2005; **62**: 593–  
11 602.
- 12 44 Orth M, Bronzova J, Tritsch C, Ray Dorsey E, Ferreira JJ, Gemperli A.  
13 Comparison of Huntington's Disease in Europe and North America. *Mov*  
14 *Disord Clin Pract* 2017; **4**: 358–67.
- 15 45 Tabrizi SJ, Scahill RI, Owen G, *et al.* Predictors of phenotypic progression and  
16 disease onset in premanifest and early-stage Huntington's disease in the  
17 TRACK-HD study: analysis of 36-month observational data. *Lancet Neurol*  
18 2013; **12**: 637–49.
- 19 46 Bachoud-Lévi A-C, Ferreira J, Massart R, *et al.* International Guidelines for the  
20 Treatment of Huntington's Disease. *Front Neurol* 2019; **10**: 710.
- 21 47 Shahn Z, Li Y, Sun Z, Mohan A, Sampaio C, Hu J. G-Computation and  
22 Hierarchical Models for Estimating Multiple Causal Effects From Observational  
23 Disease Registries With Irregular Visits. *AMIA Jt Summits Transl Sci*  
24 *proceedings AMIA Jt Summits Transl Sci* 2019; **2019**: 789–98.

- 1 48 Sun Z, Li Y, Ghosh S, *et al.* A Data-Driven Method for Generating Robust  
2 Symptom Onset Indicators in Huntington's Disease Registry Data. *AMIA .*  
3 *Annu Symp proceedings AMIA Symp 2017*; **2017**: 1635–44.
- 4 49 Long JD, Mills JA. Joint modeling of multivariate longitudinal data and survival  
5 data in several observational studies of Huntington's disease. *BMC Med Res*  
6 *Methodol* 2018; **18**: 138.
- 7 50 Tabrizi SJ, Leavitt BR, Landwehrmeyer GB, *et al.* Targeting Huntingtin  
8 Expression in Patients with Huntington's Disease. *N Engl J Med* 2019; **380**:  
9 2307–16.
- 10

## 1 Tables

|                     | TDS (N=2403)    |                                | TIS (N=2403)    |                                | SDMT (N=3137)   |                                 | Stroop Interference (N=3273) |                                 |
|---------------------|-----------------|--------------------------------|-----------------|--------------------------------|-----------------|---------------------------------|------------------------------|---------------------------------|
|                     | Effect (95% CI) | <i>P</i>                       | Effect (95% CI) | <i>P</i>                       | Effect (95% CI) | <i>P</i>                        | Effect (95% CI)              | <i>P</i>                        |
| <i>Motor</i>        | 0.15 (±1.85)    | 8.71 x 10 <sup>-1</sup>        | 0.67 (±1.93)    | 4.93 x 10 <sup>-1</sup>        | -12.37 (±3.90)  | <b>5.62 x 10<sup>-10</sup></b>  | -9.34 (±3.76)                | <b>1.19 x 10<sup>-6</sup></b>   |
| <i>Cognitive</i>    | 0.38 (±0.39)    | 5.28 x 10 <sup>-2</sup>        | -0.41 (±0.40)   | 4.53 x 10 <sup>-2</sup>        | -3.52 (±0.81)   | <b>2.28 x 10<sup>-17</sup></b>  | -3.41 (±0.76)                | <b>3.29 x 10<sup>-18</sup></b>  |
| <i>Apathy</i>       | 1.73 (±0.40)    | <b>4.05 x 10<sup>-17</sup></b> | 0.48 (±0.42)    | 2.36 x 10 <sup>-2</sup>        | -2.70 (±0.83)   | <b>2.37 x 10<sup>-10</sup></b>  | -2.15 (±0.79)                | <b>1.00 x 10<sup>-7</sup></b>   |
| <i>Depression</i>   | 1.49 (±0.40)    | <b>5.67 x 10<sup>-13</sup></b> | 1.13 (±0.42)    | <b>1.37 x 10<sup>-7</sup></b>  | -0.09 (±0.84)   | 8.41 x 10 <sup>-1</sup>         | -0.53 (±0.79)                | 1.88 x 10 <sup>-1</sup>         |
| <i>POB</i>          | -0.15 (±0.42)   | 4.96 x 10 <sup>-1</sup>        | 0.04 (±0.44)    | 8.70 x 10 <sup>-1</sup>        | -1.28 (±0.85)   | 3.26 x 10 <sup>-3</sup>         | -1.10 (±0.80)                | 7.45 x 10 <sup>-3</sup>         |
| <i>Irritability</i> | 0.15 (±0.43)    | 4.97 x 10 <sup>-1</sup>        | 1.82 (±0.45)    | <b>1.99 x 10<sup>-15</sup></b> | 1.28 (±0.89)    | 4.52 x 10 <sup>-3</sup>         | 1.01 (±0.84)                 | 1.76 x 10 <sup>-2</sup>         |
| <i>VAB</i>          | 0.72 (±0.47)    | 2.65 x 10 <sup>-3</sup>        | 1.57 (±0.49)    | <b>3.29 x 10<sup>-10</sup></b> | -1.24 (±0.97)   | 1.26 x 10 <sup>-2</sup>         | -1.20 (±0.92)                | 1.06 x 10 <sup>-2</sup>         |
| <i>Psychosis</i>    | -0.45 (±0.68)   | 1.98 x 10 <sup>-1</sup>        | -0.50 (±0.71)   | 1.67 x 10 <sup>-1</sup>        | -2.53 (±1.38)   | <b>3.38 x 10<sup>-4</sup></b>   | -3.18 (±1.28)                | <b>1.07 x 10<sup>-6</sup></b>   |
| Age                 | 0.01 (±0.02)    | 2.18 x 10 <sup>-1</sup>        | -0.09 (±0.02)   | <b>8.17 x 10<sup>-13</sup></b> | -0.53 (±0.05)   | <b>1.02 x 10<sup>-99</sup></b>  | -0.52 (±0.05)                | <b>2.89 x 10<sup>-104</sup></b> |
| CAG                 | -0.03 (±0.06)   | 3.54 x 10 <sup>-1</sup>        | -0.21 (±0.07)   | <b>1.17 x 10<sup>-9</sup></b>  | -1.56 (±0.14)   | <b>3.97 x 10<sup>-102</sup></b> | -1.25 (±0.13)                | <b>2.38 x 10<sup>-71</sup></b>  |
| Sex (F)             | -0.12 (±0.37)   | 5.17 x 10 <sup>-1</sup>        | 0.35 (±0.38)    | 7.14 x 10 <sup>-2</sup>        | -1.28 (±0.76)   | <b>9.73 x 10<sup>-4</sup></b>   | -1.22 (±0.72)                | <b>9.13 x 10<sup>-4</sup></b>   |
| Duration            | 0.05 (±0.04)    | 5.62 x 10 <sup>-3</sup>        | 0.02 (±0.04)    | 3.08 x 10 <sup>-1</sup>        | -0.41 (±0.08)   | <b>4.78 x 10<sup>-25</sup></b>  | -0.32 (±0.07)                | <b>4.82 x 10<sup>-18</sup></b>  |

2

3 **Table 1.** Association of validated clinical scores with the HD Clinical Characteristics  
4 Questionnaire symptoms (shown in italics), and other covariates. For binary  
5 covariates (CCQ symptoms and sex) “effect” is the increase/decrease in the clinical  
6 score associated with presence of that covariate. For quantitative covariates (age,  
7 CAG, duration), “effect” is the change in clinical score associated with an increase of  
8 one unit in the covariate. In addition to having a confirmed onset and pathogenic  
9 CAG length (36-93), individuals must have no co-morbid diagnosis of schizophrenia,  
10 schizotypy or schizoaffective disorder. Significant associations after Bonferroni  
11 correction for 4 phenotypes and 12 covariates are shown in bold ( $P < 1.04 \times 10^{-3}$ )  
12 and nominally significant *P* values are italicised ( $P < 0.05$ ). CI: confidence interval;  
13 TDS: Total depression score from the Hospital Anxiety and Depression Scale; TIS:  
14 Total irritability score from Snaith’s irritability scale; SDMT: Symbol digits modalities  
15 test; POB: perseverative/obsessive behaviour; VAB: violent or aggressive behaviour;  
16 Sex (F): female.

|              | Males |      |           | Females |      |           | OR<br>(95% CI)     | P value (c <sup>2</sup> )      |
|--------------|-------|------|-----------|---------|------|-----------|--------------------|--------------------------------|
|              | Yes   | No   | Frequency | Yes     | No   | Frequency |                    |                                |
| Motor        | 2691  | 28   | 98.97%    | 2859    | 25   | 99.13%    | 1.19 (0.69 - 2.05) | 5.29 x 10 <sup>-1</sup>        |
| Cognitive    | 1584  | 1132 | 58.32%    | 1688    | 1187 | 58.71%    | 1.02 (0.91 - 1.13) | 7.66 x 10 <sup>-1</sup>        |
| Apathy       | 1456  | 1259 | 53.63%    | 1495    | 1374 | 52.11%    | 0.94 (0.85 - 1.05) | 2.56 x 10 <sup>-1</sup>        |
| Depression   | 1582  | 1135 | 58.23%    | 2025    | 853  | 70.36%    | 1.70 (1.52 - 1.90) | <b>2.57 x 10<sup>-21</sup></b> |
| POB          | 1005  | 1711 | 37.00%    | 1038    | 1834 | 36.14%    | 0.96 (0.86 - 1.07) | 5.04 x 10 <sup>-1</sup>        |
| Irritability | 1706  | 1006 | 62.91%    | 1634    | 1240 | 56.85%    | 0.78 (0.70 - 0.87) | <b>4.03 x 10<sup>-6</sup></b>  |
| VAB          | 947   | 1769 | 34.87%    | 777     | 2100 | 27.01%    | 0.69 (0.62 - 0.77) | <b>1.99 x 10<sup>-10</sup></b> |
| Psychosis    | 319   | 2396 | 11.75%    | 325     | 2549 | 11.31%    | 0.96 (0.81 - 1.13) | 6.06 x 10 <sup>-1</sup>        |

1

2 **Table 2.** Lifetime prevalence of motor and psychiatric symptoms in males and  
3 females with HD. Data from HD Clinical Characteristics Questionnaire at last  
4 recorded clinic visit in Registry. Chi-square (c<sup>2</sup>) tests the difference between  
5 prevalence in males and females. Odds ratios (OR) >1 indicates the symptom is  
6 more common in females; odds ratios <1 indicates the symptom is more common in  
7 males. To be included, individuals must have a pathogenic CAG length (36-93) and  
8 confirmed clinical HD onset. Significant P values in bold ( $P < 6.25 \times 10^{-3}$ , multiple  
9 testing correction). CI: confidence interval; POB: perseverative/obsessive behaviour;  
10 VAB: violent or aggressive behaviour.

|              | Male                     |      | Female                   |      | <i>P</i>                      | Both                     |      |
|--------------|--------------------------|------|--------------------------|------|-------------------------------|--------------------------|------|
|              | R <sup>2</sup> (95% CI)  | N    | R <sup>2</sup> (95% CI)  | N    |                               | R <sup>2</sup> (95% CI)  | N    |
| Motor        | 0.678<br>(0.657 - 0.697) | 2684 | 0.649<br>(0.628 - 0.670) | 2844 | 5.42 x 10 <sup>-2</sup>       | 0.663<br>(0.648 - 0.677) | 5528 |
| Cognitive    | 0.610<br>(0.579 - 0.639) | 1570 | 0.629<br>(0.600 - 0.656) | 1681 | 3.80 x 10 <sup>-1</sup>       | 0.619<br>(0.598 - 0.639) | 3251 |
| Apathy       | 0.595<br>(0.562 - 0.627) | 1423 | 0.562<br>(0.528 - 0.595) | 1462 | 1.83 x 10 <sup>-1</sup>       | 0.578<br>(0.554 - 0.601) | 2885 |
| Depression   | 0.412<br>(0.374 - 0.449) | 1551 | 0.351<br>(0.318 - 0.385) | 1994 | 3.50 x 10 <sup>-2</sup>       | 0.375<br>(0.350 - 0.400) | 3545 |
| POB          | 0.539<br>(0.496 - 0.581) | 973  | 0.440<br>(0.394 - 0.485) | 1016 | <b>3.67 x 10<sup>-3</sup></b> | 0.489<br>(0.457 - 0.52)  | 1989 |
| Irritability | 0.463<br>(0.428 - 0.498) | 1670 | 0.547<br>(0.513 - 0.579) | 1601 | <b>1.25 x 10<sup>-3</sup></b> | 0.503<br>(0.478 - 0.527) | 3271 |
| VAB          | 0.479<br>(0.431 - 0.524) | 927  | 0.478<br>(0.426 - 0.528) | 761  | 9.79 x 10 <sup>-1</sup>       | 0.477<br>(0.442 - 0.511) | 1688 |
| Psychosis    | 0.401<br>(0.316 - 0.484) | 312  | 0.424<br>(0.340 - 0.504) | 318  | 7.29 x 10 <sup>-1</sup>       | 0.411<br>(0.351 - 0.469) | 630  |

1

2 **Table 3.** Variance in age at onset (R<sup>2</sup>) explained by pathogenic CAG repeat length  
3 for eight symptoms in males and females with HD. Ages at onset were  
4 logarithmically transformed and plotted against CAG length. *P* values test difference  
5 between male and female R<sup>2</sup>. Significant *P* values ( $P < 6.25 \times 10^{-3}$ ; multiple testing  
6 correction) are in bold and nominally significant *P* values ( $P < 0.05$ ) italicised.  
7 Individuals had to have a clinical onset of HD, a known sex and a pathogenic CAG  
8 length (36-93) to be included. CI: confidence interval; POB: perseverative/obsessive  
9 behaviour; VAB: violent or aggressive behaviour.

10



|           | Motor (N=1644)     |                                         | Cognitive (N=1644) |                                          | Apathy (N=1643)    |                                         |
|-----------|--------------------|-----------------------------------------|--------------------|------------------------------------------|--------------------|-----------------------------------------|
|           | OR (95% CI)        | <i>P</i>                                | OR (95% CI)        | <i>P</i>                                 | OR (95% CI)        | <i>P</i>                                |
| Sex (F)   | 0.49 (0.14 - 1.66) | $2.51 \times 10^{-1}$                   | 1.20 (0.97 - 1.49) | $9.75 \times 10^{-2}$                    | 1.07 (0.87 - 1.31) | $5.13 \times 10^{-1}$                   |
| CAG       | 0.95 (0.83 - 1.10) | $5.10 \times 10^{-1}$                   | 1.01 (0.98 - 1.03) | $6.64 \times 10^{-1}$                    | 0.99 (0.96 - 1.01) | $2.32 \times 10^{-1}$                   |
| Duration  | 0.91 (0.82 - 1.01) | $8.32 \times 10^{-2}$                   | 1.00 (0.98 - 1.03) | $6.99 \times 10^{-1}$                    | 1.00 (0.98 - 1.02) | $8.96 \times 10^{-1}$                   |
| Alcohol   | 1.00 (0.93 - 1.08) | $9.61 \times 10^{-1}$                   | 1.02 (1.01 - 1.04) | $8.78 \times 10^{-3}$                    | 1.00 (0.99 - 1.02) | $5.56 \times 10^{-1}$                   |
| Tobacco   | 1.10 (0.96 - 1.26) | $1.54 \times 10^{-1}$                   | 1.01 (0.99 - 1.02) | $3.00 \times 10^{-1}$                    | 1.02 (1.00 - 1.03) | $4.94 \times 10^{-3}$                   |
| Education | 0.89 (0.75 - 1.06) | $1.97 \times 10^{-1}$                   | 1.01 (0.98 - 1.05) | $4.03 \times 10^{-1}$                    | 0.98 (0.95 - 1.01) | $2.02 \times 10^{-1}$                   |
| TFC       | 1.05 (0.75 - 1.46) | $7.85 \times 10^{-1}$                   | 0.78 (0.74 - 0.81) | <b><math>1.58 \times 10^{-25}</math></b> | 0.87 (0.84 - 0.91) | <b><math>1.14 \times 10^{-9}</math></b> |
| TMS       | 1.17 (1.08 - 1.27) | <b><math>7.81 \times 10^{-5}</math></b> | 1.00 (0.99 - 1.00) | $2.67 \times 10^{-1}$                    | 1.00 (0.99 - 1.00) | $2.59 \times 10^{-1}$                   |

  

|           | Depression (N=1645) |                                         | POB (N=1641)       |                                         | Irritability (N=1645) |                                         |
|-----------|---------------------|-----------------------------------------|--------------------|-----------------------------------------|-----------------------|-----------------------------------------|
|           | OR (95% CI)         | <i>P</i>                                | OR (95% CI)        | <i>P</i>                                | OR (95% CI)           | <i>P</i>                                |
| Sex (F)   | 1.77 (1.44 - 2.17)  | <b><math>6.98 \times 10^{-8}</math></b> | 1.07 (0.86 - 1.32) | $5.68 \times 10^{-1}$                   | 0.75 (0.61 - 0.92)    | $5.36 \times 10^{-3}$                   |
| CAG       | 0.96 (0.93 - 0.98)  | <b><math>1.32 \times 10^{-4}</math></b> | 1.00 (0.97 - 1.02) | $6.93 \times 10^{-1}$                   | 0.99 (0.97 - 1.01)    | $4.74 \times 10^{-1}$                   |
| Duration  | 1.03 (1.01 - 1.05)  | <i><math>1.10 \times 10^{-2}</math></i> | 1.03 (1.00 - 1.05) | <i><math>1.68 \times 10^{-2}</math></i> | 1.03 (1.01 - 1.05)    | <i><math>6.84 \times 10^{-3}</math></i> |
| Alcohol   | 0.99 (0.98 - 1.01)  | $2.66 \times 10^{-1}$                   | 1.00 (0.99 - 1.02) | $5.14 \times 10^{-1}$                   | 1.01 (0.99 - 1.02)    | $4.79 \times 10^{-1}$                   |
| Tobacco   | 1.02 (1.01 - 1.03)  | <i><math>8.14 \times 10^{-4}</math></i> | 1.01 (1.00 - 1.02) | $2.04 \times 10^{-1}$                   | 1.02 (1.01 - 1.03)    | <b><math>1.02 \times 10^{-4}</math></b> |
| Education | 0.99 (0.96 - 1.02)  | $5.83 \times 10^{-1}$                   | 1.00 (0.97 - 1.03) | $8.21 \times 10^{-1}$                   | 1.00 (0.97 - 1.03)    | $8.44 \times 10^{-1}$                   |
| TFC       | 0.90 (0.86 - 0.94)  | <b><math>7.30 \times 10^{-6}</math></b> | 0.89 (0.85 - 0.93) | <b><math>1.10 \times 10^{-6}</math></b> | 0.93 (0.89 - 0.97)    | <i><math>8.83 \times 10^{-4}</math></i> |
| TMS       | 0.98 (0.98 - 0.99)  | <b><math>2.59 \times 10^{-5}</math></b> | 0.99 (0.99 - 1.00) | $6.09 \times 10^{-2}$                   | 0.99 (0.98 - 1.00)    | <i><math>7.46 \times 10^{-3}</math></i> |

  

|           | VAB (N=1645)       |                                         | Psychosis (N=1642) |                                         |
|-----------|--------------------|-----------------------------------------|--------------------|-----------------------------------------|
|           | OR (95% CI)        | <i>P</i>                                | OR (95% CI)        | <i>P</i>                                |
| Sex (F)   | 0.75 (0.60 - 0.94) | <i><math>1.27 \times 10^{-2}</math></i> | 0.81 (0.57 - 1.14) | $2.23 \times 10^{-1}$                   |
| CAG       | 1.00 (0.98 - 1.02) | $9.42 \times 10^{-1}$                   | 0.99 (0.95 - 1.02) | $4.84 \times 10^{-1}$                   |
| Duration  | 1.04 (1.02 - 1.06) | <i><math>9.10 \times 10^{-4}</math></i> | 1.02 (0.98 - 1.05) | $3.47 \times 10^{-1}$                   |
| Alcohol   | 1.00 (0.99 - 1.01) | $9.29 \times 10^{-1}$                   | 1.02 (1.00 - 1.04) | <i><math>3.35 \times 10^{-2}</math></i> |
| Tobacco   | 1.02 (1.01 - 1.03) | <i><math>2.08 \times 10^{-3}</math></i> | 1.00 (0.98 - 1.02) | $8.38 \times 10^{-1}$                   |
| Education | 0.99 (0.95 - 1.02) | $3.69 \times 10^{-1}$                   | 0.92 (0.88 - 0.97) | <i><math>2.24 \times 10^{-3}</math></i> |
| TFC       | 0.88 (0.84 - 0.93) | <b><math>2.07 \times 10^{-7}</math></b> | 0.83 (0.77 - 0.89) | <b><math>3.33 \times 10^{-7}</math></b> |
| TMS       | 0.99 (0.99 - 1.00) | $7.49 \times 10^{-2}$                   | 0.99 (0.98 - 1.00) | $1.47 \times 10^{-1}$                   |

3

4 **Table 4.** Psychiatric and cognitive symptoms are associated with reduced functional  
5 capacity. Multiple logistic regression using binary HD-CCQ data for 8 symptoms (0 =  
6 no symptom; 1 = reported symptom) and clinical covariates. Significant associations  
7 after Bonferroni correction for 8 symptoms and 8 covariates are shown in bold ( $P <$   
8  $7.81 \times 10^{-4}$ ) and nominally significant associations in italics ( $P < 0.05$ ). With the  
9 exception of sex, the odds ratio (OR) indicates the effect on the outcome probability  
10 associated with an increase of one unit in the covariate. In addition to having a  
11 confirmed onset and pathogenic CAG length (36-93), individuals must have no co-  
12 morbid diagnosis of schizophrenia, schizotypy or schizoaffective disorder. CI:  
13 confidence interval; Sex (F): female; POB: perseverative/obsessive behaviour; TFC:  
14 total functional capacity; TMS: total motor score; VAB: violent or aggressive  
15 behaviour.

1 **Figure Legends**

2 **Figure 1. The initial manifestation of HD varies with age and CAG length.**

3 All included individuals had a pathogenic CAG length (36-93) and confirmed HD  
4 onset age determined by a rating clinician. **(A)** Frequency of different onset types in  
5 four age groups, chosen to show juvenile HD and then 20 year bins for clarity. Total  
6 N=6289; <20 years, N=188; 20-40 years, N=2216; 40-60 years, N=3276; >60 years,  
7 N=609. **(B)** Frequency of different onset types in six CAG length groups, chosen for  
8 clarity across the pathogenic range. Total N=6289; 36-39 CAG, N=156; 40-44 CAG,  
9 N=3813; 45-49 CAG, N=1735; 50-54 CAG, N=387; 55-59 CAG, N=97; >60 CAG,  
10 N=101.

11

12 **Figure 2. The onsets of cognitive and psychiatric symptoms relative to motor**  
13 **onset in HD.**

14 The age at onset of motor symptoms was subtracted from the age at onset of each  
15 cognitive/psychiatric symptom when present. Timings of up to +/- 40 years relative to  
16 motor onset shown. Only individuals with a rater-confirmed age at onset and CAG  
17 length (36-93) were included. Data from HD-CCQ. **(A)** Cognitive impairment  
18 N=3225; **(B)** Apathy N=2852; **(C)** Depression N=3495; **(D)** Irritability N=3235.

19

20 **Figure 3. Mean ages at onset for motor and psychiatric symptoms at different**  
21 **CAG repeat lengths.**

22 Shown are the mean ages at symptom onset as recorded by the HD Clinical  
23 Characteristics Questionnaire for apathy (N = 2739), cognitive impairment (N =  
24 3069), depression (N = 3399), irritability (N = 3117) and motor symptoms (N = 4889).

25

26

27
